## Altered basal ganglia output during self-restraint.

Bon-Mi Gu<sup>1,2\*</sup> and Joshua D Berke<sup>1,3</sup>

<sup>1</sup> Department of Neurology, University of California, San Francisco, CA 94158, USA.

<sup>2</sup> Department of Neurology and Neurological Sciences, Stanford University, Stanford, CA 94305, USA.

<sup>3</sup> Department of Psychiatry and Behavioral Sciences, Neuroscience Graduate Program, Kavli Institute for Fundamental Neuroscience, Weill Institute for Neurosciences, University of California, San Francisco, CA 94158, USA.

\*Correspondence: [bonmigu@stanford.edu](mailto:bonmigu@stanford.edu)

### Abstract

Suppressing actions is essential for flexible behavior. Multiple neural circuits involved in behavioral inhibition converge upon a key basal ganglia output nucleus, the substantia nigra pars reticulata (SNr). To examine how changes in basal ganglia output contribute to self-restraint, we recorded SNr neurons during a proactive behavioral inhibition task. Rats responded to *Go!* cues with rapid leftward or rightward movements, but also prepared to cancel one of these movement directions on trials when a *Stop!* cue might occur. This action restraint – visible as direction-selective slowing of reaction times – altered both rates and patterns of SNr spiking. Overall firing rate was elevated before the *Go!* cue, and this effect was driven by a subpopulation of direction-selective SNr neurons. In neural state space, this corresponded to a shift away from the restrained movement. SNr neurons also showed more variable inter-spike intervals during proactive inhibition. This corresponded to more variable state-space trajectories, which may slow reaction times via reduced preparation to move. These findings open new perspectives on how basal ganglia dynamics contribute to movement preparation and cognitive control.

Keywords: behavioral inhibition, substantia nigra pars reticulata, population dynamics, spike variability, Parkinson's disease.

## 1 **Introduction**

2 Fluid, efficient behavior often involves simply triggering well-learned behaviors.  
3 However, flexibility requires that such behaviors can be suppressed, should circumstances  
4 change. This capacity for behavioral inhibition is considered central to cognitive control (Bari  
5 and Robbins, 2013), and is compromised in a range of neurological and psychiatric disorders  
6 (Chambers *et al.*, 2009).

7 Behavioral inhibition can be ‘reactive’ – for example, promptly responding to an  
8 unexpected *Stop!* cue by cancelling upcoming actions. Reactive inhibition has been shown to  
9 involve fast cue responses in frontal cortex and basal ganglia pathways (Jahanshahi *et al.*,  
10 2015; Wager *et al.*, 2005), including from the subthalamic nucleus (STN) to SNr (Schmidt *et al.*  
11 2013). This rapid response to stimuli can transiently, and broadly, retard action initiation,  
12 providing time for a second set of basal ganglia mechanisms to cancel actions (Mallet *et al.*  
13 2016; Schmidt and Berke 2018).

14 By contrast, ‘proactive’ inhibition refers to a state of preparation, in which particular  
15 actions are restrained (Cai *et al.*, 2011, Claffey *et al.*, 2010). Proactive inhibition has been  
16 argued to be especially important for human life (Aron 2011), and is behaviorally apparent as  
17 longer reaction times (RTs) selectively for the restrained action. The underlying mechanisms are  
18 not well understood, but have been proposed (Aron 2011) to involve the pathway from striatum  
19 “indirectly” to SNr, via globus pallidus pars externa (GPe). In a prior study (Gu *et al.* 2020) we  
20 therefore recorded from GPe neurons as rats engaged proactive inhibition towards a specific  
21 action. The state of being prepared to stop did not involve an overall net change in GPe firing  
22 rate, but rather a shift at the level of neural population dynamics away from action initiation, and  
23 towards the alternative action. One objective of the present work was to determine whether a  
24 corresponding preparatory change in population dynamics is visible “downstream” in SNr,  
25 thereby altering basal ganglia output.

1 Basal ganglia output neurons are thought to affect behavior not just via their firing rates,  
2 but also via their firing patterns and synchrony (Rubin *et al.*, 2012). In particular, Parkinson's  
3 disease (PD) is associated with an increase in firing variability and synchronous bursting, often  
4 without rate changes (Lobb, 2014; Willard *et al.*, 2019). As PD is characterized by slowed  
5 movement initiation (Low *et al.*, 2002), we assessed whether related physiological changes are  
6 present when movements are slowed as the result of proactive inhibition.

7

## 8 **Results.**

### 9 **Reaction times are selectively slowed with proactive inhibition.**

10 We used a selective proactive inhibition task (Gu *et al.*, 2020), a variant of our  
11 extensively-characterized rat stop-signal task (Leventhal *et al.*, 2012; Schmidt *et al.*, 2013;  
12 Mallet *et al.*, 2016) (Fig. 1A). Rats start a trial by nose-poking an illuminated start-port. To  
13 proceed, they need to maintain this position for a variable delay (500-1250ms, uniform  
14 distribution) until a *Go!* cue is presented (1 kHz or 4 kHz tone, indicating a leftward or rightward  
15 movement respectively). If the movement is initiated rapidly after the *Go!* cue (RT limit <  
16 800ms), and completed correctly and promptly (movement time limit, MT < 500ms), rats are  
17 rewarded with a sugar pellet dispensed at a separate food hopper. On a subset of trials, the *Go!*  
18 cue is followed by a *Stop!* cue (white noise burst; delay after *Go!* cue onset = 100 - 250ms).  
19 This indicates that the rat should not initiate a movement, and instead hold their nose in the  
20 Center port for at least 800ms (after *Go!* cue onset) to trigger reward delivery.

21 To probe selective proactive inhibition, the three possible start ports were associated  
22 with different *Stop!* cue probabilities (counterbalanced across rats; Gu *et al.*, 2020, Fig. 1B,  
23 Table 1). These were: no possibility of *Stop!* cue ("No-Stop"); 50% probability that a left *Go!* cue  
24 will be followed by the *Stop!* cue ("Maybe-Stop-left"); and 50% probability that a right *Go!* cue  
25 will be followed by the *Stop!* cue ("Maybe-Stop-right"). We obtained SNr microelectrode  
26 recordings from rats (n=10) that had successfully learned this proactive task, as indicated by

1 significant and selective slowing of RTs for movements contraversive to the implant side (Fig.  
 2 1C). For example, if electrodes were placed in the right SNr, contraversive proactive inhibition  
 3 would mean longer RTs for Maybe-Stop-left trials, compared to No-Stop trials. In the same rats  
 4 we compared SNr activity in sessions in which this proactive effect was significant (n=60), to  
 5 sessions in which it was not (n=25; Fig. 1C).

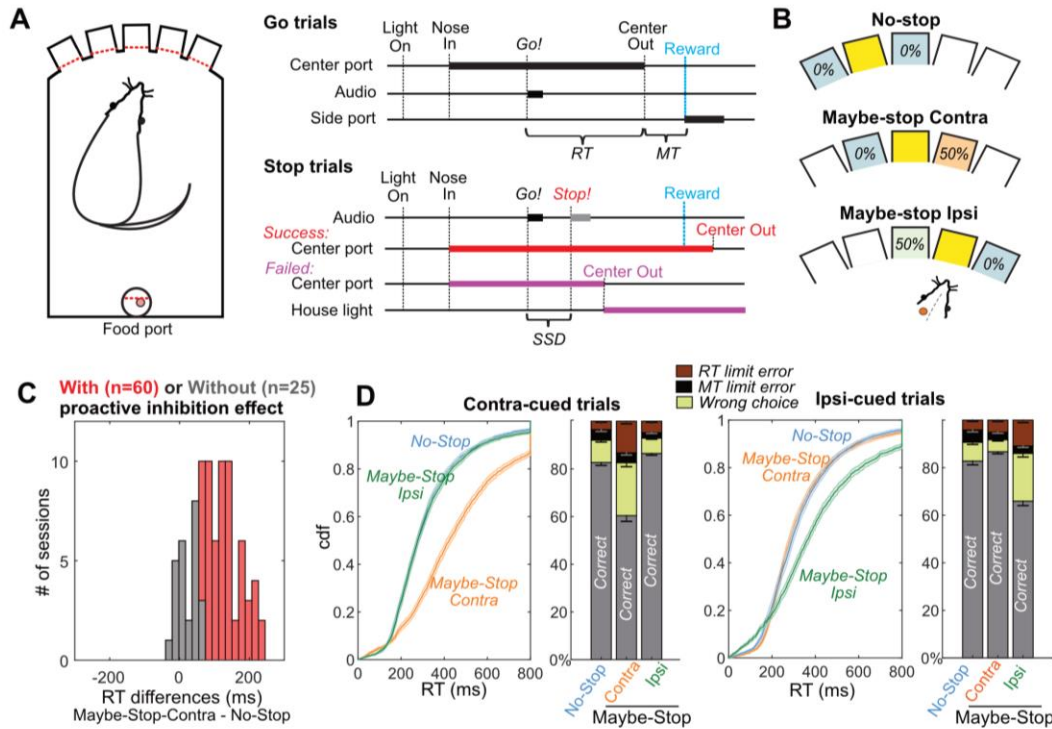

6  
 7 The sessions with significant proactive inhibition effect show RT slowing selectively for  
 8 the Maybe-Stop direction (Wilcoxon signed rank tests on median RTs of Maybe-Stop-Contra  
 9 versus No-Stop: Contra cues:  $z = 6.8$ ,  $p = 1.1e-11$ ), but not for the other direction (Ipsi cues:  $z =$

1 -1.2,  $p = 0.22$ ) (Fig. 1D). Additionally, on Maybe-Stop-Contra trials rats were more likely to fail to  
2 respond quickly enough (RT limit errors; Wilcoxon signed rank tests,  $z = 6.4$ ,  $p = 1.5e-10$ ) and to  
3 select the wrong choice (i.e. not matching the *Go!* cue; Wilcoxon signed rank tests,  $z = 6.5$ ,  $p =$   
4  $1.1e-10$ ).

## 6 **Selective proactive inhibition recruits specific SNr subpopulations.**

7 We examined the task-related activity of individual SNr neurons ( $n=446$ ; mean firing  
8 rate=38Hz, locations are shown in Supp. Fig. 1) recorded during the sessions with significant  
9 proactive inhibition. We first compared overall cell activity between Maybe-Stop-Contra and No-  
10 Stop trials. We focused on the epoch just before the *Go!* cue, as we presume that this time is  
11 critical for being “prepared-to-stop”. Average firing rates were significantly higher in the Maybe-  
12 Stop-Contra condition (Fig. 2A, top), and this difference was generated by a significant fraction  
13 of SNr neurons (Fig. 2A, bottom). Example cells show significant differences before the *Go!* cue  
14 between conditions (Fig. 2B). This elevated SNr firing with action restraint was not observed in  
15 the sessions without significant behavioral evidence for proactive inhibition (Fig. 2A, right; 173  
16 neurons, mean FR=44Hz).

17 A common categorization of SNr neurons distinguishes those that increase, versus  
18 decrease, firing rate in conjunction with behavioral events (e.g. Bryden *et al.*, 2011; Fan *et al.*,  
19 2012; Gulley *et al.*, 2002; Sato and Hikosaka, 2002). Decreases in firing shortly before  
20 movement onset are thought to enable movements, by disinhibiting downstream structures  
21 including the superior colliculus (Hikosaka and Wurtz, 1983b). If “decrease-type” neurons are  
22 receiving more excitation during proactive inhibition, this might delay their decrease to the level  
23 needed to release movements, resulting in longer reaction times. We therefore hypothesized  
24 that proactive inhibition is associated with elevated firing specifically of decrease-type neurons.



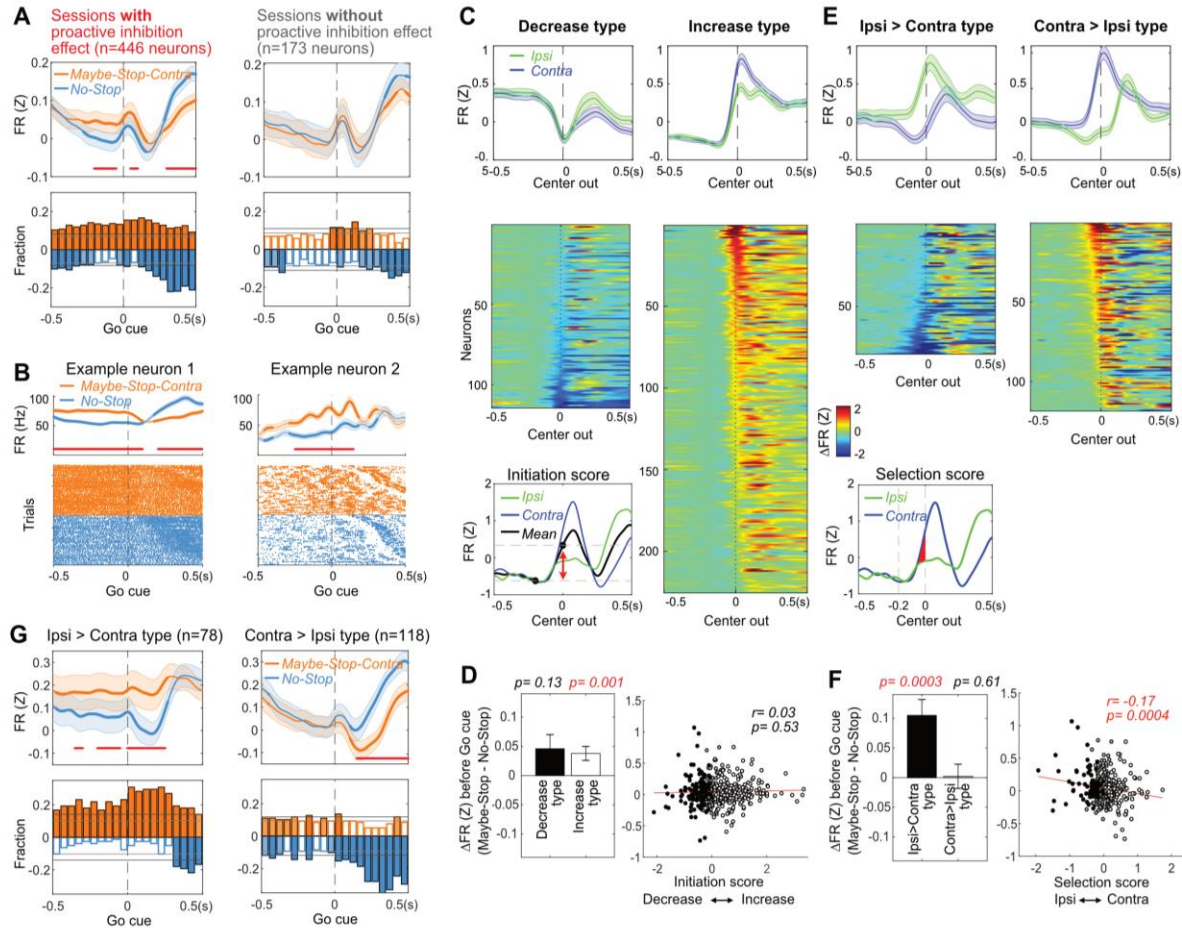

**Figure 2. Elevated firing rates of specific SNr subpopulations with selective proactive inhibition.** (A) Top left: before the Go! cue SNr firing is elevated in Maybe-Stop-Contra compared to No-Stop conditions. This occurs selectively in sessions with behavioral evidence of proactive inhibition (left). Each neuron's firing rate is Z-scored and averaged (over all trials in which a Go! cue was presented, regardless of Stop! cues) Shaded band,  $\pm$ S.E.M across n=446 (left) or n=173 neurons (right). Thicker lines indicate significant differences between conditions ( $p < 0.05$ ; Wilcoxon signed rank tests at each time point) and red lines at the bottom indicate times with significant difference remaining after Bonferroni correction (by the number of 50ms time bins;  $p < 0.05$ ). Bottom left: fraction of SNr neurons whose firing rate significantly differs between conditions, across time ( $p < 0.05$ ; Wilcoxon rank sum tests in each 50ms bin). Higher firing with Maybe-Stop-Contra, No-Stop conditions are shown as positive (orange) or negative (blue), respectively. Horizontal grey lines indicate thresholds for a significant proportion of neurons (binomial test,  $p < 0.05$  without or with multiple-comparisons correction, light and dark grey lines respectively). Light and dark color-filled bars are those for which the threshold was crossed without or with multiple-comparisons correction. Right, sessions without significant behavioral evidence of proactive inhibition do not show this firing rate difference between conditions (same format as left panels; n=173 neurons). (B) Two individual example neurons demonstrating the proactive elevation of firing rate before the Go! cue. Top: averaged firing rates in each condition. Shaded band,  $\pm$ S.E.M across trials. Bottom: raster plots of individual trials. Trials are sorted by RTs. (C) Neurons were categorized as decrease-type or increase-type, based on an "Initiation Score". We defined the "Initiation Score" for each neuron as the change in (Z-scored) firing rate in the 0.2s before Center Out (inset shows example neuron). Plots show average firing of each subpopulation (top;  $\pm$ S.E.M) and individual cells sorted by Initiation Score (bottom). (D) No relation between Initiation Score and proactive inhibition (assessed as the difference between Maybe-Stop-Contra and No-Stop trials, in the 200ms before Go! cue). Bar graph (inset) shows that on average, both increase- and decrease- type neurons modestly increase firing with proactive inhibition (Wilcoxon signed rank tests in each group). Error bar is  $\pm$ S.E.M across neurons. (E) We defined the "Selection Score" for each neuron as the integral of the difference in (Z-scored) firing rate between Contra and Ipsi actions during the 0.2s epoch before Center Out. Remainder of panel is as C, but for Selection Score. (F) Significant negative correlation between Selection Score and proactive inhibition. Bar graph (inset) shows that Ipsi>Contra neurons preferentially increase activity on Maybe-Stop-Contra trials. (G) Same result as F, using the format of panel A to illustrate time course.

- 1 We categorized cells as increase-type or decrease-type based on their change in firing
- 2 rate during the 200ms preceding movement onset (Fig. 2C). Increase-type were more

1 numerous, as previously reported (Bryden *et al.*, 2011; Joshua *et al.*, 2009). Contrary to our  
2 hypothesis, both increase-type and decrease-type neurons contributed to elevated SNr activity  
3 with action restraint (Fig. 2D, left). There was no relationship between the extent of elevated  
4 firing in Maybe-Stop trials, and the firing rate change before movement onset (Fig. 2D, right).

5 We then examined whether proactive inhibition effects were related to neurons'  
6 response selectivity, operationally defined as the firing rate difference between Contra and Ipsi  
7 actions just before Center Out (Fig. 2E, inset). We found a significant relationship: neurons  
8 more active just before Ipsi compared to just before Contra movements ("Ipsi > Contra") showed  
9 elevated firing when Contra actions might need to be cancelled (Fig. 2F,G). No such  
10 relationship was found for neurons with the opposite selectivity ("Contra > Ipsi"; Fig. 2F,G).

11 We next considered the interaction between direction selectivity and increases vs.  
12 decreases in firing, in proactive inhibition. A cell could be classified as "Ipsi > Contra" because it  
13 preferentially increases firing with Ipsi movements, or because it preferentially decreases firing  
14 with Contra movements. We found that both subtypes had elevated firing before the *Go!* cue on  
15 Maybe-Stop-Contra trials (Supp. Fig. 2). Therefore, the proactive effect was not simply a matter  
16 of SNr cells that pause with Contra movements starting from a higher baseline rate, though this  
17 may contribute.

18

### 19 **Restraining one action biases population dynamics towards the alternative action.**

20 The elevated average firing rate of Ipsi > Contra cells suggests a preparatory bias  
21 towards Ipsi action, at times when Contra actions might need to be cancelled. To examine this  
22 further we turned to a state-space analysis, as we previously used with GPe data (Gu *et al.*,  
23 2020). We extracted principal components from the average firing rates of each neuron during  
24 Contra and Ipsi movements (Supp. Fig. 3) and used these to visualize neural population  
25 trajectories (Fig. 3A, top). We defined "Initiation" and "Selection" axes as the common, and  
26 distinct, aspects of these trajectories respectively, during the 200ms before action initiation. In

- 1 particular, the Initiation Axis is a line drawn between the average state space positions at 200ms
- 2 and 0ms relative to Center Out (disregarding the direction of movement). The Selection Axis
- 3 connects the midpoints of the Contra and Ipsi trajectories (averaging across the same time
- 4 epoch).

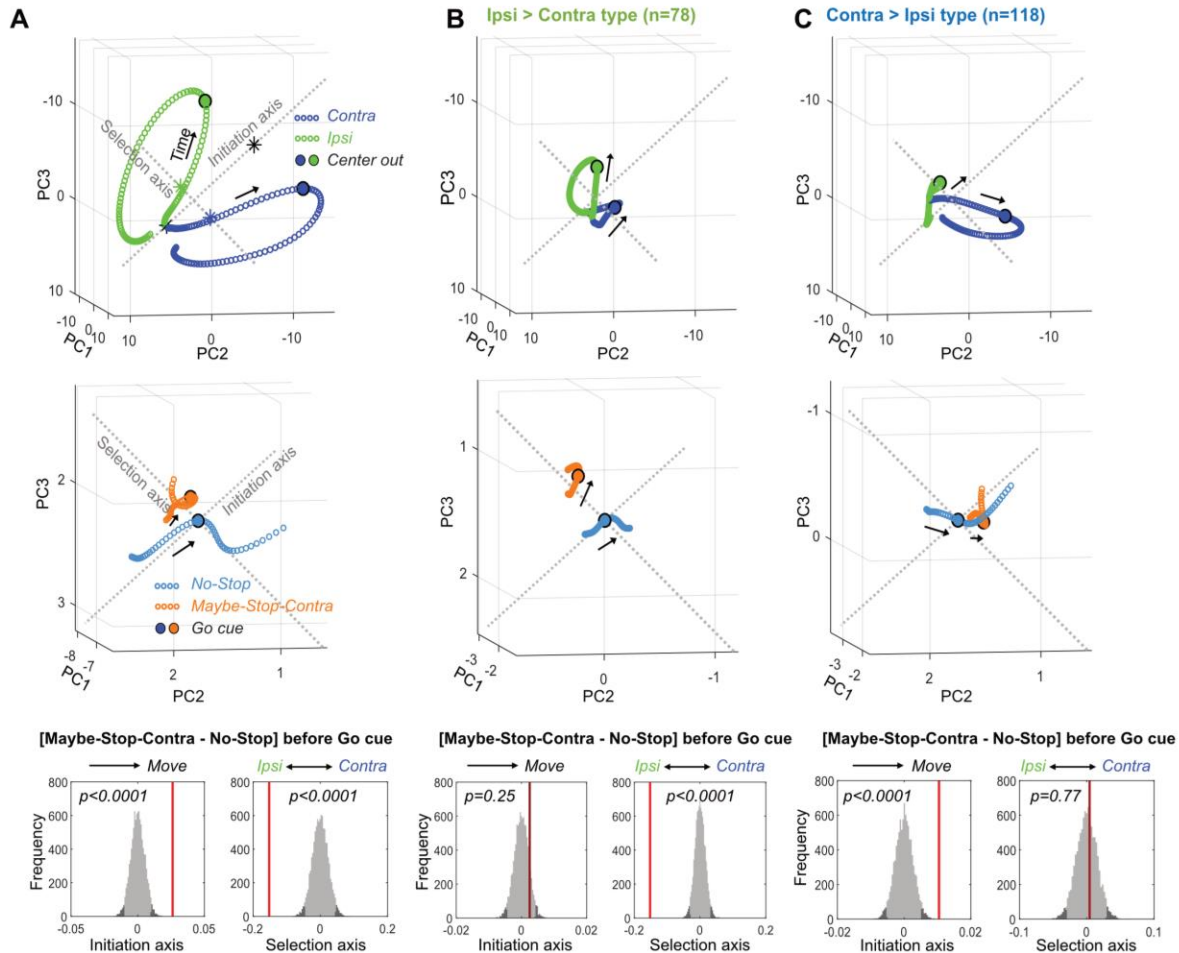

**Figure 3. Biased SNr population dynamics during proactive inhibition.** (A). Top, Overall SNr state-space trajectories before and during Contra (blue) and Ipsi movements (green), in the state space of the first 3 principal components (PCs). Trajectories show +250ms around detected movement onset (Center Out, larger circles), with each small circle separated by 4ms. 'Initiation Axis' joins the positions (black asterisks) 200ms before and at action initiation (averaging Contra and Ipsi actions). 'Selection Axis' joins the means of each trajectory in the same epoch (colored asterisks). Middle, Comparing Maybe-Stop-Contra (orange) and No-Stop (blue) trials (+100ms around Go! cue) in the same state space as above. Overall population state is visibly biased toward Ipsi along the Selection Axis. Bottom, Permutation tests of bias along each axis (average during -200ms to 0 relative to Go! cue), using all 10 PCs. Red bars, observed results; Grey, distributions of surrogate data from 10000 random shuffles of trial type labels. Dark grey indicates 5% of distributions at each tail. (B). As A, but for Ipsi > Contra cells only. The proactive bias towards Ipsi along the Selection Axis is more clearly visible. For comparisons, the PC dimension scale and Initiation/Selection axis are matched to the graph in A. (C). As A-B, but for Contra > Ipsi cells. These do not show a proactive bias on the Selection Axis, but on the Initiation Axis instead.

- 5 When we projected Maybe-Stop-Contra data into this space, we found that overall SNr
- 6 population activity showed a clear shift before the Go! cue (Fig. 3A, middle). This shift was
- 7 especially pronounced on the Selection Axis, with a highly significant bias towards Ipsi (Fig. 3A,



1 bottom). There was also a significant bias on the Initiation Axis (towards movement). These two  
2 biases were associated with distinct functional cell classes (Fig. 3B, C). Ipsi > Contra cells  
3 showed a strong Selection Axis bias, without a significant Initiation Axis bias (Fig. 3B), and the  
4 converse was seen for Contra > Ipsi cells (Fig. 3C). This finding provides further evidence that  
5 Ipsi > Contra cells generate an Ipsi bias during selective proactive inhibition.

6       Moreover, the state of preparation was related to the subsequent outcome of the trial.  
7 Trajectories during wrong choice trials were biased both toward Ipsi action and towards initiation  
8 at the time of *Go!* cue (Supp. Fig. 3D), consistent with our prior GPe results (Gu *et al.*, 2020).  
9 Trials in which rats failed to initiate actions (limited hold violations) did not show any statistically  
10 significant bias at the *Go!* cue time, although after the *Go!* cue the trajectory showed movement  
11 away from action initiation (Supp. Fig. 3D).

12

### 13 **Less regular firing with proactive inhibition.**

14       As movement slowing has been associated with changes in basal ganglia firing patterns  
15 in Parkinson's Disease (Sharott *et al.*, 2014; Tai 2022), we examined whether changes in SNr  
16 firing patterns accompany slower movement initiation during proactive inhibition. For each  
17 neuron we calculated the coefficient of variation (CV) of inter-spike intervals, and the proportion  
18 of spikes within bursts (Fig. 4A, B; using the Poisson surprise method; Legendy and Salcman  
19 1985). To obtain sufficient numbers of inter-spike-intervals, both analyses used longer (3s)  
20 epochs before the *Go!* cue.

21       Proactive slowing was associated with altered spiking variability, in several distinct  
22 analyses. Neurons recorded in sessions with significant proactive inhibition behavior (n=446)  
23 showed more irregular and bursty firing compared to neurons (n=173) in sessions that did not  
24 (Fig. 4C). The degree of irregularity was correlated with the mean session-wide reaction times  
25 (Supp. Fig. 4A). Increased irregularity and bursting were also seen during Maybe-Stop-Contra  
26 trials compared to No-Stop trials, selectively in those sessions with significant proactive

- 1 inhibition effect (Fig. 4D, left), and not those without (Fig. 4D, right). Moreover, the degree of
- 2 increased irregularity between conditions was correlated with the magnitude of the proactive
- 3 effect on reaction times (Supp. Fig. 4B).

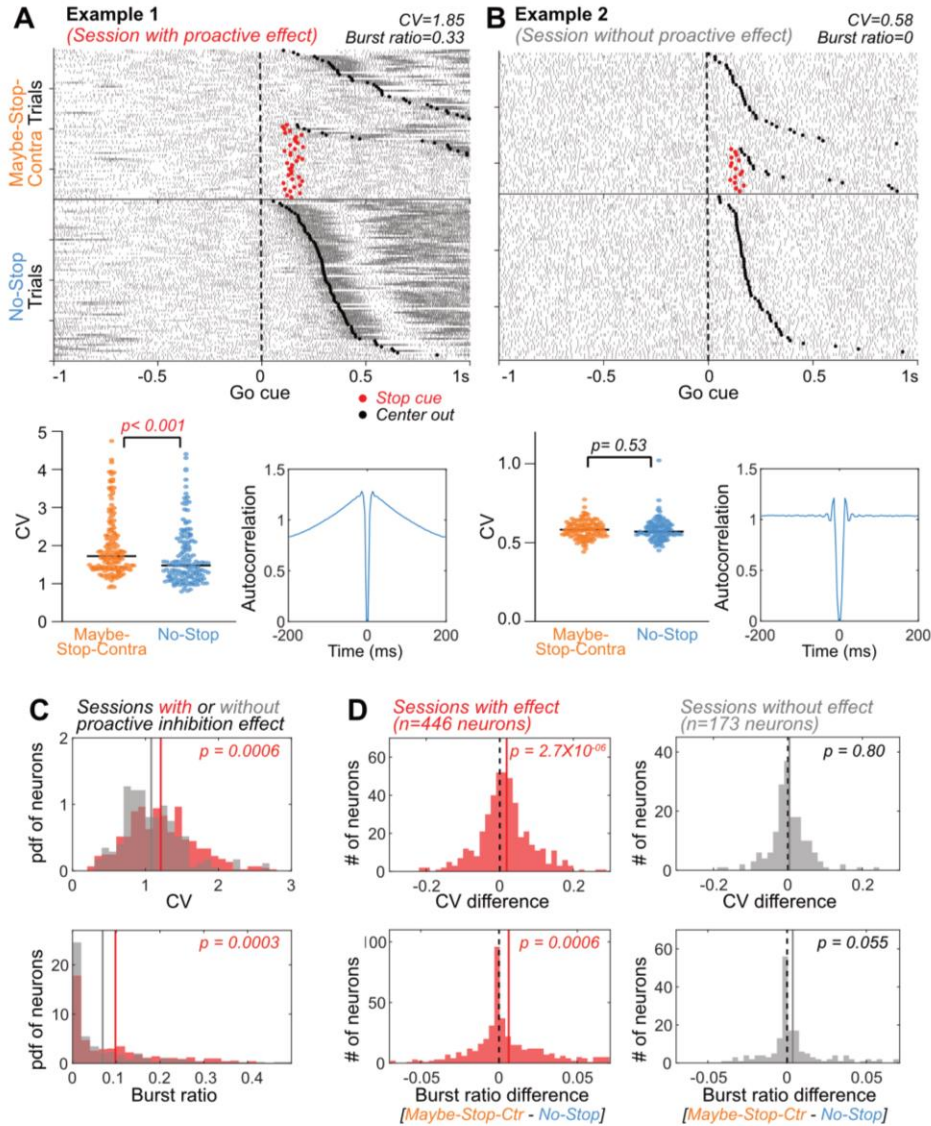

**Figure 4. SNr firing is more irregular and bursty with proactive inhibition.** (A) An example neuron from a session with proactive inhibition effect, showing spike rasters (Top; aligned on contra *Go!* cues, sorted by RTs), CVs of individual trials (Bottom left, for the 3s preceding *Go!* cues, Wilcoxon rank sum test) and autocorrelograms (Bottom right; for the 3s preceding *Go!* cues). CV: coefficient of variation of inter-spike intervals. (B) An example neuron from a session without a proactive inhibition effect. Same format as in (A). (C) Elevated CV and burst ratio of neurons recorded in sessions with behavioral evidence of proactive inhibition, compared to sessions without (Wilcoxon rank sum tests). This effect was also seen at the level of individual rats (Supp. Fig. 4C). Grey and red lines indicate mean of sessions with and without proactive inhibition effect, respectively. (D) Within-session comparison of Maybe-Stop-Contra and No-Stop trials shows increased CV and burst ratio when proactive inhibition is engaged (left). This effect is not present on sessions without significant proactive slowing of reaction times (right). Wilcoxon signed rank tests. Dotted black lines indicates zero and colored lines indicate mean of the neurons.

1 **Proactive inhibition increases the variability of neural trajectories.**

2           How could increased spiking variability contribute to the slowing of RTs? At the  
3 population level, spike variability would correspond to more erratic state-space trajectories  
4 before the *Go!* cue (Fig. 5A). This would result in a more variable state at the (unpredictable)  
5 time of *Go!* cue onset. If effective movement preparation involves positioning neural activity  
6 within a “optimal subspace”, as previously proposed (Churchland *et al.* 2006), this more variable  
7 state would in turn result in RTs that are longer (on average) and more variable (across trials).

8           To assess this idea we quantified trajectory fluctuations on individual trials (Fig. 5B-D).  
9 We included sessions ( $n=27$ ) in which more than 5 neurons were recorded simultaneously, and  
10 examined trajectories in the 3s window before the *Go!* cue (for comparison to our CV measure).  
11 In the same way as CV measures variability over time of an individual neuron (one dimension)  
12 compared to its mean rate, we can measure the within-trial variability of a population ( $n$   
13 dimensions, without PCA) by comparing the Euclidean distance of each time point to the mean  
14 position (Fig. 5C).

15           As expected, there was a strong relationship between CV of individual neurons and their  
16 corresponding population trajectory variability (Fig. 5E). Furthermore, trajectory variability was  
17 significantly increased by proactive inhibition (Figs. 5F). Trajectory variability increased during  
18 the hold period (examining the 0.8s epoch just before the *Go!* cue, excluding trials with hold  
19 duration  $<0.8$ s, Wilcoxon signed rank test,  $p=0.003$ ), and was also observed even beforehand  
20 (0.8s epoch before Nose In, Wilcoxon signed rank test,  $p=0.003$ ). This increase in within-trial  
21 trajectory variability with proactive inhibition indeed resulted in a more variable state space  
22 position at the time of *Go!* cue onset, across trials (Fig. 5G). Consistent with our hypothesis, this  
23 variability of state-space position across trials was correlated with RT (Fig. 5H).

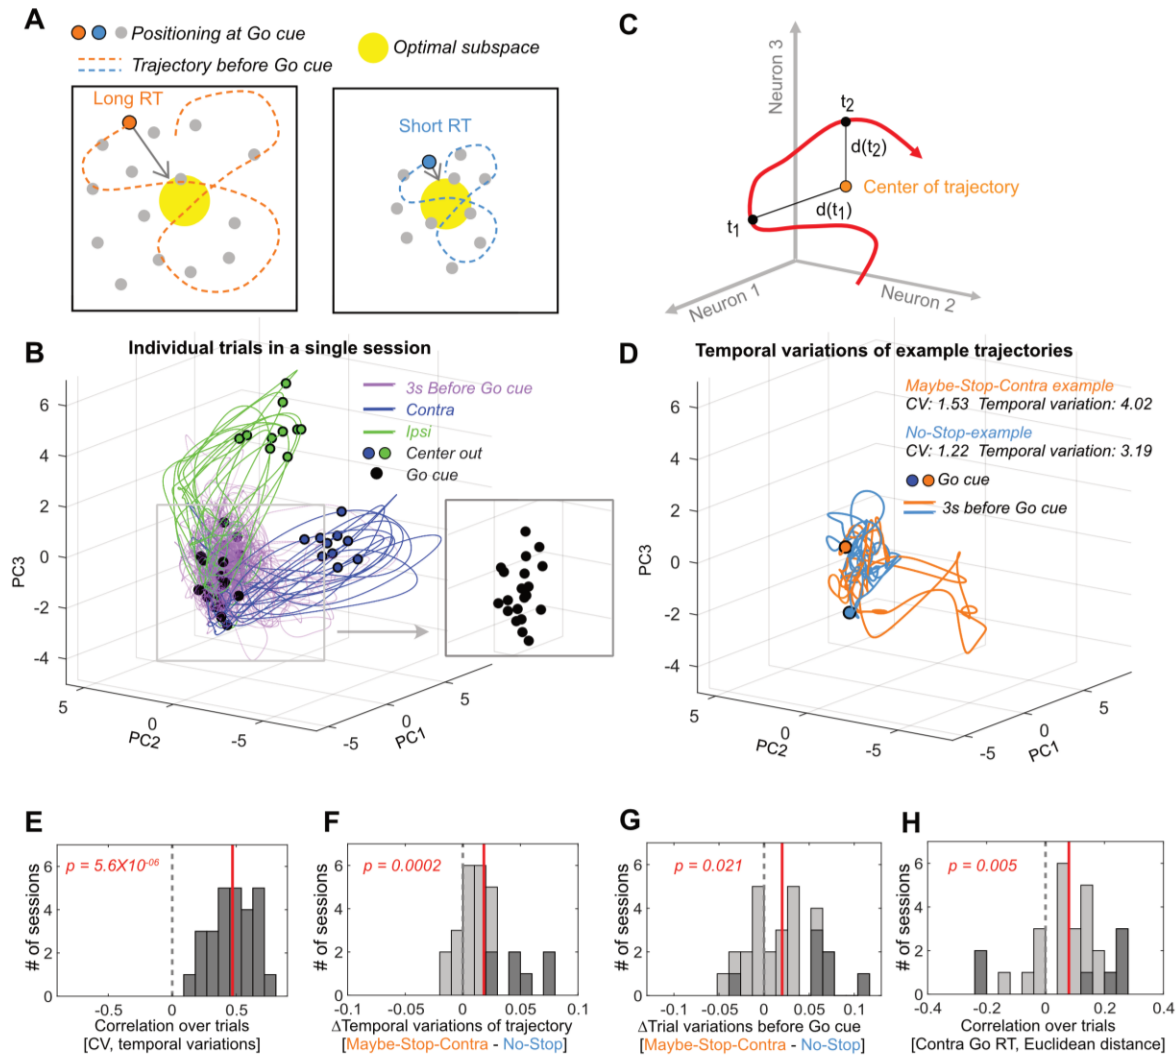

**Figure 5. Altered variability of state trajectories with proactive inhibition.** (A) Conceptual illustration for the relationship between trajectory variability and RTs. Larger fluctuations in trajectory will tend to result in a position further away from the “optimal subspace” when the Go! cue arrives. (B) Individual trial trajectories (10 trials each for Contra and Ipsi movements) for one example session (n=46 neurons). Trajectories are shown after PCA for visualization. (C) Trajectory variability was defined as the mean of the Euclidean distances at each time point to the mean position over the trajectory (in the full neural state space, without PCA). (D) Example trajectories for Maybe-Stop-Contra (orange) and No-Stop (blue) trials, before the Go! cue. Trajectories are shown after PCA for visualization. (E) Correlations between CV and trajectory variability for each session. (F) Trajectory variability increased on Maybe-Stop-Contra, compared to No-Stop trials. (G) Across trials, the state space position at Go! cue (-200ms to 0) was more variable for Maybe-Stop-Contra, compared to No-Stop trials. (H) Variability across trials of the state space position at Go! cue (-200ms to 0) was positively correlated with RT. Trials with less than 100ms reaction times were excluded because they would have already initiated the movement trajectory. For (E)-(H), sessions with more than 5 neurons (# of session = 27) were used for analysis (Wilcoxon signed rank test across session values). Dotted grey line indicates zero and red line indicates mean of the session values. Dark grey bars indicate sessions showing significant correlation ( $p < 0.05$  for (E), (H)), or conditional differences (Wilcoxon rank sum test,  $p < 0.05$  for (F), (G)).

1

## 2 Proactive modulation of firing rate, and variability, are dissociable.

3 Changes in preparation to move or stop can be evoked by explicit cues, as in our task

4 design, but also by the subject's ongoing experience – notably, what happened on the previous



1 trial (Bissett and Logan, 2011; Pouget *et al.* 2011). We therefore examined how such ongoing  
 2 experience affects the proactive influences over SNr firing. Regardless of previous trial type  
 3 Maybe-Stop-Contra trials had slower RT (Fig. 6, top row), and an Ipsi-biased SNr state-space  
 4 position (Fig. 6, third row). By contrast, the increased CV in SNr spiking was particularly  
 5 apparent following Stop-fail trials (Fig. 6, bottom). This suggests that increased spike variability  
 6 occurs when rats are especially concerned to avoid hasty responses, having just failed to  
 7 sufficiently restrain behavior on the previous trial.

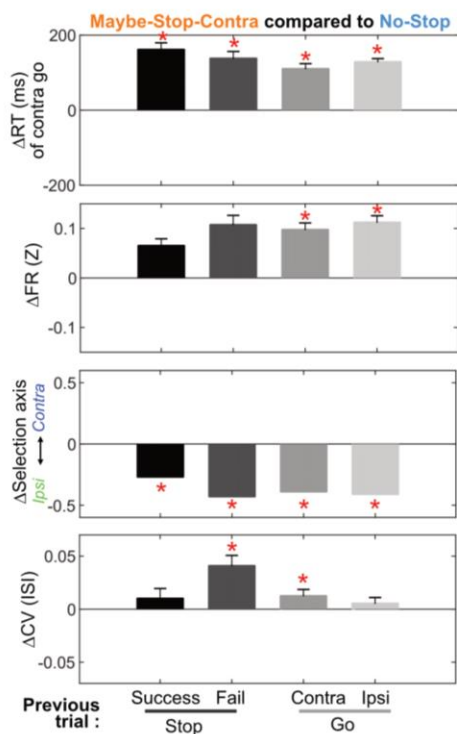

**Figure 6. Feedback effect by previous trials and relation to trial outcomes.** Differences in reaction time, firing rates, selection axis positions, and CVs of Maybe-Stop-Contra trials, compared to the No-stop condition (zero), and separated by previous trial type. The effect of previous trial type reached significance for the difference in CV (Friedman's test,  $X^2(3)=13.38$ ,  $p=0.004$ ), but not for contra go RT ( $X^2(3)=2.84$ ,  $p=0.42$ ) nor in firing rates ( $X^2(3)=5.09$ ,  $p=0.17$ ). Firing rates and selection axis measures use Ipsi > contra cells (during 200ms before Go! cue); all cells are included in the CV calculation. \* $p < 0.05$  with Bonferroni multiple comparison correction (Compared to No-Stop trials, permutation test as in Fig 3 for Selection axis, and Wilcoxon signed rank test for others). Error bars are  $\pm$  S.E.M across sessions ( $n=60$ ) for reaction times and across neurons ( $n=446$ ) for firing rates and CV.

8

## 9 Discussion

10 Our capacity to inhibit actions and thoughts can be influenced by a wide range of factors  
 11 (Bari and Robbins 2013). These include external cues (such as warning stimuli) and “internal”  
 12 processes such as attention and motivation (Meyer and Bucci 2016). Our experimental design  
 13 provides some useful constraints on which factors are relevant to our results. We used a  
 14 standard, operational definition of selective proactive inhibition: slowing of RTs for the particular

1 movement that *might* need to be cancelled. Since this effect was observed even when no *Stop!*  
2 cue was actually presented, and was direction-selective, it cannot be explained simply by (for  
3 example) priming of the more global, cue-evoked Stop mechanisms that support reactive  
4 inhibition (i.e. “preparation to stop”). Instead, it implies an altered state already present by the  
5 time of the *Go!* cue.

6 We found evidence for this altered state in two aspects of SNr spiking. A subpopulation  
7 of movement-selective SNr neurons showed elevated firing before the *Go!* cue, and this was  
8 associated with a shift in population activity away from the specific restrained action and  
9 towards the alternative. At the same time, more erratic SNr firing results in a more variable state  
10 at the time of the *Go!* cue. This variability is associated with slowed RTs, plausibly because  
11 effective movement preparation involves achieving a more constrained range of network  
12 activity. Moreover, these firing rate and variability modulations reflect two dissociable  
13 mechanisms for proactive control, as they were recruited differently depending on events on the  
14 prior trial.

15

## 16 **Basal ganglia dynamics and the nature of restraint**

17 Our results add to prior evidence that, beyond simple sensory or motor correlates, SNr  
18 firing is modulated by internal factors such as task context (Hikosaka and Wurtz 1983a; Lintz  
19 and Felsen 2016). At the same time our operational definition of proactive inhibition does not  
20 fully constrain which internal factors are at play – and these may vary both within, and between,  
21 individual subjects. Basal ganglia activity is especially affected by changes in reward  
22 expectation (Lauwereyns *et al.* 2002) including in SNr (Sato and Hikosaka 2002; Yasuda and  
23 Hikosaka 2017), producing faster RTs towards more rewarding movements. In our proactive  
24 task the Maybe-Stop direction receives rewards at a lower rate (due to failures-to-Stop), so  
25 asymmetrical reward expectation might be at least partially responsible for the neural and  
26 choice bias towards Ipsi movements on Maybe-Stop-Contra trials. However, the slower Contra

1 RTs on Maybe-Stop-Contra trials were not accompanied by faster Ipsi RTs, suggesting that  
2 slowing of Contra movements did not result simply from a greater preparation of Ipsi  
3 movements.

4 The SNr state-space bias during proactive inhibition may arise from the “indirect  
5 pathway” projection from GPe, which we found to have a similar neural bias towards Ipsi  
6 movements in a prior study (Gu *et al.*, 2020). However, proactive inhibition produced no overall  
7 change in GPe firing rates, and we were not able to identify a distinct subpopulation of  
8 modulated GPe neurons. The reasons for this GPe : SNr difference are not clear. Recent  
9 modeling has demonstrated that the influence of the GABAergic GPe inputs over SNr neurons  
10 can be far more complex (Simmons *et al.* 2020) than shown in classic rate models of basal  
11 ganglia function, for example switching from inhibitory to excitatory in an activity-dependent  
12 manner (Phillips *et al.* 2020). Alternatively, the shift in SNr Ipsi > Contra neuron firing with  
13 proactive inhibition may reflect other basal ganglia inputs, particularly the direct pathway input  
14 from striatum, or hyperdirect via the subthalamic nucleus (Schmidt *et al.* 2013).

15

## 16 **Behavioral control and neural variability**

17 Our study also leaves unresolved the origins of the increased SNr spike variability we  
18 observed with proactive inhibition. Like GPe and STN neurons, SNr neurons are intrinsic  
19 pacemakers that spontaneously fire regularly even if their inputs are blocked (Zhou and Lee  
20 2011). These inputs – which include the aforementioned direct and indirect pathways, and also  
21 extensive local collaterals within SNr (Brown *et al.*, 2014; Mailly *et al.*, 2003) – thus alter SNr  
22 spiking by either accelerating or delaying the occurrence of the next spike. Changes in spike  
23 time variability presumably reflect either changes in local network properties, e.g. due to  
24 neuromodulation (Delaville *et al.* 2012) or changes in the statistics of extrinsic inputs.

25 More variable SNr inter-spike-intervals within trials were associated with more variable  
26 trajectories through state-space, a more variable network state at *Go!* cue, and longer and more

1 variable RTs. In the cortex, decreases in spike variability have been previously linked to various  
2 processes including stimulus onset (Churchland *et al.*, 2010), attention (Cohen and Maunsell,  
3 2009), and movement preparation (Churchland *et al.*, 2006). There is also evidence of within-  
4 trial changes in spike variability in the striatum (Berke 2011). To our knowledge, there are no  
5 prior observations of specific task cues evoking *increases* in variability between or within trials.  
6 Our finding that variability increases with proactive inhibition – in particular following Stop-fail  
7 trials – suggests that variability might be actively elevated as part of a behavioral strategy. This  
8 would fit with proposals that neural variability can confer behavioral advantages, such as  
9 increased flexibility (Waschke *et al.* 2021). Alternatively, increased neural variability with  
10 proactive inhibition may simply reflect the *absence* of a reduction in variability that accompanies  
11 movement preparation. In this way, preparation to stop would consist, at least in part, of less  
12 preparation to go. Either way, our results demonstrate that cognitive control strategies can  
13 operate through shifts in neural variability.

14         Connecting single-neuron measures of variability to state-space concepts of movement  
15 preparation offers an intriguing perspective on PD, which is characterized by both slowed  
16 movements (Low *et al.*, 2002) and elevated single-neuron spike variability (Dorval *et al.*, 2008;  
17 Lobb, 2014; Willard *et al.*, 2019). A more variable state of preparation may help explain why  
18 *average* RTs and movement times are slowed in PD, yet the fastest movements are still  
19 preserved (Mazzoni *et al.* 2007). An important goal for future studies is to better understanding  
20 how shifts in neural variability occur in the basal ganglia, and whether they originate from the  
21 same mechanisms during both proactive inhibition and Parkinson's Disease.

22

23

24 **Acknowledgements.** We thank Charles Wilson and members of the Berke Lab for valuable  
25 feedback. This work was supported by UCSF, NIH (R01MH101697, R01NS123516), and CHDI.



1 **Author contributions.** B.G., Conceptualization, Data curation, Software, Formal analysis,  
2 Investigation, Visualization, Methodology, Writing – original draft; J.D.B., Conceptualization,  
3 Resources, Supervision, Funding acquisition, Writing – original draft, Writing – review and  
4 editing.

5 **Declaration of interests.** The authors have no competing interests.

6

7 **Figure legends.**

8 **Figure 1. Selective proactive inhibition.** (A) Left, operant box configuration, with dashed red  
9 lines indicating photobeams for nose detection; right, event sequence for Go and Stop trials.  
10 RT, reaction time; MT, movement time; SSD, stop-signal delay; Reward, delivery of a sugar  
11 pellet to the food port. (B) Trial start location indicates stop probabilities. In this example  
12 configuration with left SNr recording, illumination of the middle hole indicates that *Go!* cues  
13 instructing rightward movement may be followed by a *Stop!* cue, but *Go!* cues instructing  
14 leftward movements will not (“Maybe-Stop-Contra”). (C) Overall, the sessions in which SNr units  
15 were successfully recorded showed strong proactive inhibition effect (n=85, Wilcoxon signed  
16 rank tests on median RT differences between Maybe-Stop-Contra and No-Stop-Contra  
17 conditions,  $p=8.2e-15$ ). Among them, the individual sessions are considered to show proactive  
18 inhibition (red) if the reaction time difference between Maybe-Stop-Contra and No-Stop trials is  
19 statistically significant (one-tail Wilcoxon rank sum test,  $p<0.05$ ). (D) Cumulative distribution  
20 functions (cdf) of RTs of Maybe-Stop-Contra condition show selective slowing for the contra-  
21 cued trials, but not for the ipsi-cued trials. Response ratios also show selective increase of  
22 wrong choice and RT limit errors for the Maybe-Stop direction. Shaded band and error bars,  
23 S.E.M. across n = 60 sessions with proactive inhibition effect. RT limit error = nose remained in  
24 Center port for >800ms after *Go!* cue onset; MT limit error = movement time between Center  
25 Out and Side port entry >500ms.

26

1 **Figure 2. Elevated firing rates of specific SNr subpopulations with selective proactive**  
2 **inhibition.** (A) Top left: before the *Go!* cue SNr firing is elevated in Maybe-Stop-Contra  
3 compared to No-Stop conditions. This occurs selectively in sessions with behavioral evidence of  
4 proactive inhibition (left). Each neuron's firing rate is Z-scored and averaged (over all trials in  
5 which a *Go!* cue was presented, regardless of *Stop!* cues) Shaded band, +-S.E.M across n=446  
6 (left) or n=173 neurons (right). Thicker lines indicate significant differences between conditions  
7 ( $p < 0.05$ ; Wilcoxon signed rank tests at each time point) and red lines at the bottom indicate  
8 times with significant difference remaining after Bonferroni correction (by the number of 50ms  
9 time bins;  $p < 0.05$ ). Bottom left: fraction of SNr neurons whose firing rate significantly differs  
10 between conditions, across time ( $p < 0.05$ ; Wilcoxon rank sum tests in each 50ms bin). Higher  
11 firing with Maybe-Stop-Contra, No-Stop conditions are shown as positive (orange) or negative  
12 (blue), respectively. Horizontal grey lines indicate thresholds for a significant proportion of  
13 neurons (binomial test,  $p < 0.05$  without or with multiple-comparisons correction, light and dark  
14 grey lines respectively). Light and dark color-filled bars are those for which the threshold was  
15 crossed without or with multiple-comparisons correction. Right, sessions without significant  
16 behavioral evidence of proactive inhibition do not show this firing rate difference between  
17 conditions (same format as left panels; n=173 neurons). (B) Two individual example neurons  
18 demonstrating the proactive elevation of firing rate before the *Go!* cue. Top: averaged firing  
19 rates in each condition. Shaded band, +-S.E.M across trials. Bottom: raster plots of individual  
20 trials. Trials are sorted by RTs. (C) Neurons were categorized as decrease-type or increase-  
21 type, based on an "Initiation Score". We defined the "Initiation Score" for each neuron as the  
22 change in (Z-scored) firing rate in the 0.2s before Center Out (inset shows example neuron).  
23 Plots show average firing of each subpopulation (top; +-S.E.M) and individual cells sorted by  
24 Initiation Score (bottom). (D) No relation between Initiation Score and proactive inhibition  
25 (assessed as the difference between Maybe-Stop-Contra and No-Stop trials, in the 200ms  
26 before *Go!* cue). Bar graph (inset) shows that on average, both increase- and decrease- type

1 neurons modestly increase firing with proactive inhibition (Wilcoxon signed rank tests in each  
2 group). Error bar is  $\pm$ S.E.M across neurons. (E) We defined the “Selection Score” for each  
3 neuron as the integral of the difference in (Z-scored) firing rate between Contra and Ipsi actions  
4 during the 0.2s epoch before Center Out. Remainder of panel is as C, but for Selection Score.  
5 (F) Significant negative correlation between Selection Score and proactive inhibition. Bar graph  
6 (inset) shows that Ipsi>Contra neurons preferentially increase activity on Maybe-Stop-Contra  
7 trials. (G) Same result as F, using the format of panel A to illustrate time course.

8  
9 **Figure 3. Biased SNr population dynamics during proactive inhibition.** (A). Top, Overall  
10 SNr state-space trajectories before and during Contra (blue) and Ipsi movements (green), in the  
11 state space of the first 3 principal components (PCs). Trajectories show  $\pm$ 250ms around  
12 detected movement onset (Center Out, larger circles), with each small circle separated by 4ms.  
13 ‘Initiation Axis’ joins the positions (black asterisks) 200ms before and at action initiation  
14 (averaging Contra and Ipsi actions). ‘Selection Axis’ joins the means of each trajectory in the  
15 same epoch (colored asterisks). Middle, Comparing Maybe-Stop-Contra (orange) and No-Stop  
16 (blue) trials ( $\pm$ 100ms around Go! cue) in the same state space as above. Overall population  
17 state is visibly biased toward Ipsi along the Selection Axis. Bottom, Permutation tests of bias  
18 along each axis (average during -200ms to 0 relative to Go! cue), using all 10 PCs. Red bars,  
19 observed results; Grey, distributions of surrogate data from 10000 random shuffles of trial type  
20 labels. Dark grey indicates 5% of distributions at each tail. (B). As A, but for Ipsi > Contra cells  
21 only. The proactive bias towards Ipsi along the Selection Axis is more clearly visible. For  
22 comparisons, the PC dimension scale and Initiation/Selection axis are matched to the graph in  
23 A. (C). As A-B, but for Contra > Ipsi cells. These do not show a proactive bias on the Selection  
24 Axis, but on the Initiation Axis instead.

25

1 **Figure 4. SNr firing is more irregular and bursty with proactive inhibition.** (A) An example  
2 neuron from a session with proactive inhibition effect, showing spike rasters (Top; aligned on  
3 contra *Go!* cues, sorted by RTs), CVs of individual trials (Bottom left, for the 3s preceding *Go!*  
4 cues, Wilcoxon rank sum test) and autocorrelograms (Bottom right; for the 3s preceding *Go!*  
5 cues). CV: coefficient of variation of inter-spike intervals. (B) An example neuron from a session  
6 without a proactive inhibition effect. Same format as in (A). (C) Elevated CV and burst ratio of  
7 neurons recorded in sessions with behavioral evidence of proactive inhibition, compared to  
8 sessions without (Wilcoxon rank sum tests). This effect was also seen at the level of individual  
9 rats (Supp. Fig. 4C). Grey and red lines indicate mean of sessions with and without proactive  
10 inhibition effect, respectively. (D) Within-session comparison of Maybe-Stop-Contra and No-  
11 Stop trials shows increased CV and burst ratio when proactive inhibition is engaged (left). This  
12 effect is not present on sessions without significant proactive slowing of reaction times (right).  
13 Wilcoxon signed rank tests. Dotted black lines indicates zero and colored lines indicate mean of  
14 the neurons.

15  
16 **Figure 5. Altered variability of state trajectories with proactive inhibition.** (A) Conceptual  
17 illustration for the relationship between trajectory variability and RTs. Larger fluctuations in  
18 trajectory will tend to result in a position further away from the “optimal subspace” when the *Go!*  
19 cue arrives. (B) Individual trial trajectories (10 trials each for Contra and Ipsi movements) for  
20 one example session (n=46 neurons). Trajectories are shown after PCA for visualization. (C)  
21 Trajectory variability was defined as the mean of the Euclidean distances at each time point to  
22 the mean position over the trajectory (in the full neural state space, without PCA). (D) Example  
23 trajectories for Maybe-Stop-Contra (orange) and No-Stop (blue) trials, before the *Go!* cue.  
24 Trajectories are shown after PCA for visualization. (E) Correlations between CV and trajectory  
25 variability for each session. (F) Trajectory variability increased on Maybe-Stop-Contra,  
26 compared to No-Stop trials. (G) Across trials, the state space position at *Go!* cue (-200ms to 0)



1 was more variable for Maybe-Stop-Contra, compared to No-Stop trials. (H) Variability across  
2 trials of the state space position at Go! cue (-200ms to 0) was positively correlated with RT.  
3 Trials with less than 100ms reaction times were excluded because they would have already  
4 initiated the movement trajectory. For (E)-(H), sessions with more than 5 neurons (# of session  
5 = 27) were used for analysis (Wilcoxon signed rank test across session values). Dotted grey line  
6 indicates zero and red line indicates mean of the session values. Dark grey bars indicate  
7 sessions showing significant correlation ( $p < 0.05$  for (E), (H)), or conditional differences  
8 (Wilcoxon rank sum test,  $p < 0.05$  for (F), (G)).

9 **Figure 6. Feedback effect by previous trials and relation to trial outcomes.** Differences in  
10 reaction time, firing rates, selection axis positions, and CVs of Maybe-Stop-Contra trials,  
11 compared to the No-stop condition (zero), and separated by previous trial type. The effect of  
12 previous trial type reached significance for the difference in CV (Friedman's test,  $\chi^2(3) = 13.38$ ,  
13  $p = 0.004$ ), but not for contra go RT ( $\chi^2(3) = 2.84$ ,  $p = 0.42$ ) nor in firing rates ( $\chi^2(3) = 5.09$ ,  $p = 0.17$ ).  
14 Firing rates and selection axis measures use Ipsi > contra cells (during 200ms before Go! cue);  
15 all cells are included in the CV calculation. \* $p < 0.05$  with Bonferroni multiple comparison  
16 correction (Compared to No-Stop trials, permutation test as in Fig 3 for Selection axis, and  
17 Wilcoxon signed rank test for others). Error bars are +-S.E.M across sessions (n=60) for  
18 reaction times and across neurons (n=446) for firing rates and CV.

19

20

21

22

23

1 **Tables**

2 **Table 1. Information on individual rats.**

| RAT  | Port location with stop probability (port1, port2 port3) | # of sessions (with/without proactive inhibition effect) | # of cells (from sessions with/without proactive inhibition effect) | Sessions with contralateral proactive inhibition effect (Mean $\pm$ SD) |                                                              |                                                            |                        |
|------|----------------------------------------------------------|----------------------------------------------------------|---------------------------------------------------------------------|-------------------------------------------------------------------------|--------------------------------------------------------------|------------------------------------------------------------|------------------------|
|      |                                                          |                                                          |                                                                     | # of trials per session (Maybe-Stop-Contra/No-Stop conditions)*         | Contralateral RTs (Maybe-Stop-Contra/No-Stop conditions, ms) | Ipsilateral RTs (Maybe-Stop-Contra/No-Stop conditions, ms) | Stop success rates (%) |
| 1015 | 0, L50, R50%                                             | 7/1                                                      | 184/20                                                              | 104 $\pm$ 27/103 $\pm$ 12                                               | 563 $\pm$ 39/363 $\pm$ 35                                    | 428 $\pm$ 45/415 $\pm$ 42                                  | 55.3 $\pm$ 10.3        |
| 1019 | L50, 0, R50%                                             | 5/2                                                      | 6/4                                                                 | 110 $\pm$ 33/122 $\pm$ 25                                               | 369 $\pm$ 47/275 $\pm$ 30                                    | 271 $\pm$ 30/321 $\pm$ 11                                  | 47.8 $\pm$ 10.9        |
| 1042 | L50, 0, R50%                                             | 2/0                                                      | 3/0                                                                 | 94 $\pm$ 5/88 $\pm$ 10                                                  | 399 $\pm$ 27/293 $\pm$ 10                                    | 277 $\pm$ 4/377 $\pm$ 37                                   | 81.1 $\pm$ 5.5         |
| 1043 | L50, R50, 0%                                             | 8/1                                                      | 30/5                                                                | 124 $\pm$ 25/131 $\pm$ 35                                               | 474 $\pm$ 49/353 $\pm$ 48                                    | 384 $\pm$ 51/387 $\pm$ 47                                  | 70.5 $\pm$ 5.6         |
| 1063 | L50, R50, 0%                                             | 8/4                                                      | 21/15                                                               | 124 $\pm$ 31/110 $\pm$ 25                                               | 347 $\pm$ 57/226 $\pm$ 29                                    | 266 $\pm$ 49/191 $\pm$ 18                                  | 26.2 $\pm$ 5.6         |
| 1064 | L50, 0, R50%                                             | 6/4                                                      | 23/26                                                               | 121 $\pm$ 20/123 $\pm$ 18                                               | 446 $\pm$ 34/338 $\pm$ 35                                    | 303 $\pm$ 13/309 $\pm$ 20                                  | 57.3 $\pm$ 4.8         |
| 1098 | 0, L50, R50%                                             | 5/2                                                      | 5/2                                                                 | 102 $\pm$ 18/109 $\pm$ 27                                               | 456 $\pm$ 17/330 $\pm$ 38                                    | 324 $\pm$ 21/327 $\pm$ 54                                  | 41.7 $\pm$ 3.1         |
| 1202 | 0, R50, L50%                                             | 10/1                                                     | 114/12                                                              | 107 $\pm$ 23/118 $\pm$ 32                                               | 494 $\pm$ 49/328 $\pm$ 36                                    | 359 $\pm$ 38/356 $\pm$ 28                                  | 56.3 $\pm$ 10.6        |
| 1296 | R50, 0, L50%                                             | 7/2                                                      | 53/11                                                               | 101 $\pm$ 17/92 $\pm$ 11                                                | 435 $\pm$ 39/330 $\pm$ 38                                    | 344 $\pm$ 41/345 $\pm$ 28                                  | 61.5 $\pm$ 13.0        |
| 1328 | R50, L50, 0%                                             | 2/8                                                      | 7/78                                                                | 127 $\pm$ 2/147 $\pm$ 19                                                | 370 $\pm$ 13/298 $\pm$ 36                                    | 275 $\pm$ 18/368 $\pm$ 65                                  | 51.8 $\pm$ 2.5         |

3 \*Number of trials are only including trials with go cue presented (e.g. trials with premature  
4 center out before Go cue are excluded).

5  
6  
7  
8

## 1 **Materials and methods**

2 **Animals.** All animal experiments were approved by the University of California, San Francisco  
3 Committee for the Use and Care of Animals. Adult male Long-Evans rats were housed on a 12  
4 hr/12 hr reverse light-dark cycle, with training and testing performed during the dark phase.

5  
6 **Behavior.** The rat proactive stop task has been previously described in detail (Gu *et al.*, 2020).  
7 Briefly, rats were trained in an operant chamber (Med Associates, Fairfax VT) which had five  
8 nose-poke holes on one wall, a food dispenser on the opposite wall, and a speaker located  
9 above the food port. Each trial starts with one of the three starting ports illuminated to indicate  
10 the *Stop!* cue probabilities ('Light On'), and the same start port was repeated for 10-15 trials.  
11 Inter-trial intervals were randomly selected between 5 and 7s. The mapping of stop probabilities  
12 to nose-poke locations are counter-balanced between rats but maintained in each rat (Table 1).

13  
14 **Electrophysiology.** We recorded SNr data from ten rats (all animals in which we successfully  
15 recorded SNr neurons during contraversive proactive inhibition). Each rat was implanted with 15  
16 or 30 tetrodes in bundles bilaterally targeting SNr (Supp. Fig1). Wide-band (0.1–9000 Hz)  
17 electrophysiological data were recorded with a sampling rate of 30000/s using an Intan  
18 RHD2000 recording system (Intan Technologies). All signals were initially referenced to a skull  
19 screw (tip-flattened) on the midline 1 mm posterior to lambda. For spike detection we re-  
20 referenced to an electrode common average, and wavelet-filtered (Wiltschko *et al.*, 2008) before  
21 thresholding. For spike sorting we performed automatic clustering units using MountainSort  
22 (Chung *et al.*, 2017) followed by manual curation of clusters. Approximately every 2-3 sessions,  
23 screws were turned to lower tetrodes by 100-160  $\mu\text{m}$ ; to avoid duplicate neurons, we did not  
24 include units from the same tetrode from multiple sessions unless the tetrodes had been moved  
25 between those sessions. We further excluded a small number of neurons on the same tetrode  
26 that appeared to be potential duplicates based on waveforms and firing properties (e.g. firing

1 rates, CV, and behavioral correlations), even though the tetrode had been moved. After  
2 recording was complete, we anesthetized rats and made small marker lesions by applying 5-10  
3  $\mu\text{A}$  current for 20 s on one or two wires of each tetrode. After perfusing the rats, tissue sections  
4 (at 40  $\mu\text{m}$ ) were stained with cresyl violet or with CD11b antibody and compared to the nearest  
5 atlas section (Paxinos, 2006).

6

## 7 **Data analysis.**

8 *Firing rates and neuron's functional grouping.* Firing rates were smoothed using a Gaussian  
9 kernel (30ms DS) and normalized (Z-scored) using the neuron's session-wide mean and SD.  
10 Most analyses were done using this normalized firing rates except fraction of units (Fig. 2 (A),  
11 (G) bottom, using binned firing rates) and bursting analysis (Fig. 4, see below).

12 Units are categorized into increase or decrease types using initiation score and into Contra>Ipsi  
13 or Ipsi>Contra types using selection score (statistically significant across trials, Wilcoxon signed  
14 rank test,  $p < 0.05$ ).

15 *Bursting.* Spike bursts were detected using the Poisson surprise method (Legendy and Salcman  
16 1985) with a surprise threshold of 5, and the burst ratio was calculated as the number of spikes  
17 fired in bursts divided by the number of all spikes in each unit. The CV of inter-spike intervals  
18 and burst ratio were calculated in each trial using a 3s time window before the *Go!* cue, and  
19 averaged across all trials (for sessions with/without proactive inhibition comparison) or across  
20 each trial type (for conditional differences).

21 *PCA analysis* was done largely as previously described (Gu *et al.*, 2020). The smoothed,  
22 normalized average time series for contra and ipsi actions (500ms each, around Center Out,  
23 Supp. Fig. 2A) were used for PCA. This population activity matrix  $\mathbf{R}$  is zero-centered, and after  
24 using MATLAB 'svd' function, the PC scores ( $\mathbf{S}$ ) was calculated as  $\mathbf{S} = \mathbf{R}\mathbf{W}$ , where  $\mathbf{W}$  is the right  
25 singular vectors.



1 To match the analysis to the Initiation and Selection scores (Figure 2), we defined the Initiation  
2 Axis by connecting state space points 200ms before and at action initiation (averaging Contra  
3 and Ipsi actions), and the Selection Axis by connecting the mean of Contra trajectories to the  
4 mean of Ipsi trajectories (again using the epoch from -200 to 0ms relative to action initiation).  
5 The projections onto the Initiation and Selection Axis were calculated as the dot product of the  
6 state space position vector and the axis vector.

7 For mapping of before Go cue time series data ( $\mathbf{R}'$ ) into the contra and ipsi action related PC  
8 dimension, new PC scores were calculated by  $\mathbf{S}' = \mathbf{R}'\mathbf{W}$  after matching the zero values of  $\mathbf{R}'$  to  
9 the matrix  $\mathbf{R}$ . For subpopulation analysis (Fig 3. (B), (C)), selected unit's population vector (e.g.  
10  $\mathbf{R}_{(\text{ipsi})}$ ) and the right singular vectors (e.g.  $\mathbf{W}_{(\text{ipsi})}$ ) were used to calculate the selective unit's PC  
11 scores ( $\mathbf{S}_{(\text{ipsi})} = \mathbf{R}_{(\text{ipsi})}\mathbf{W}_{(\text{ipsi})}$ ).

12 *Permutation tests.* To test if conditional differences are statistically significant, we ran  
13 permutation tests by randomly shuffling the two comparing trial conditions for each neuron  
14 (10000 shuffles). The original distance between the two comparing conditions were compared to  
15 the distance between shuffled trial conditions after projecting the distances onto the Initiation or  
16 Selection axis.

17 *Variability of neural trajectories:* To examine how the increased variability of individual neurons  
18 affects population dynamics, we calculated the temporal variability of neural state-space  
19 trajectories. We included data from 3s time windows before the *Go!* cue, in each session (n=27)  
20 with at least 5 recorded units and a significant proactive inhibition effect. Trajectory variability  $V$   
21 corresponds to the mean Euclidean distance between each time point of the trajectory and the  
22 center of the trajectory, i.e. how much the trajectory wanders around. For this analysis, we did  
23 not apply PCA to reduce dimensionality. Also, the trajectory variability was normalized by the  
24 number of neurons in each session. Thus, for example, if the normalized FR of population  
25 neurons ( $N$ ) at time ( $t$ ) is defined as a vector  $\overrightarrow{R}_t$ , and the center of trajectory (mean FR across

1  $t=1\dots T$ , where  $T = 1500$  for 3s time window with 500Hz sampling rate) is defined as a vector

2  $\overline{R}_c$ , Variability ( $V$ ) of a neural trajectory is defined as:

3 
$$V = \frac{1}{T\sqrt{N}} \sum_{t=1}^T \|\overline{R}_t - \overline{R}_c\|$$

4

## 5 **References**

- 6 Aron AR. 2011. From reactive to proactive and selective control: developing a richer model for  
7 stopping inappropriate responses. *Biological Psychiatry* 69:e55–e68. DOI:  
8 <https://doi.org/10.1016/j.biopsych.2010.07.024>, PMID: 20932513
- 9 Bari A, Robbins TW. Inhibition and impulsivity: behavioral and neural basis of response control.  
10 *Prog Neurobiol.* 2013 Sep;108:44-79. doi: 10.1016/j.pneurobio.2013.06.005. Epub 2013 Jul  
11 13. PMID: 23856628.
- 12 Berke JD. Functional properties of striatal fast-spiking interneurons. *Front Syst Neurosci.* 2011  
13 Jun 20;5:45. doi: 10.3389/fnsys.2011.00045. PMID: 21743805; PMCID: PMC3121016.
- 14 Bissett PG, Logan GD. Balancing cognitive demands: control adjustments in the stop-signal  
15 paradigm. *J Exp Psychol Learn Mem Cogn.* 2011 Mar;37(2):392-404. doi:  
16 10.1037/a0021800. PMID: 21171806; PMCID: PMC3064521.
- 17 Brown J, Pan WX, Dudman JT. The inhibitory microcircuit of the substantia nigra provides  
18 feedback gain control of the basal ganglia output. *Elife.* 2014 May 21;3:e02397. doi:  
19 10.7554/eLife.02397. PMID: 24849626; PMCID: PMC4067753.
- 20 Bryden DW, Johnson EE, Diao X, Roesch MR. Impact of expected value on neural activity in rat  
21 substantia nigra pars reticulata. *Eur J Neurosci.* 2011 Jun;33(12):2308-17. doi:  
22 10.1111/j.1460-9568.2011.07705.x. Epub 2011 Jun 6. PMID: 21645133; PMCID:  
23 PMC3334837.
- 24 Cai W, Oldenkamp CL, Aron AR. 2011. A proactive mechanism for selective suppression of  
25 response tendencies. *Journal of Neuroscience* 31:5965–5969. DOI:  
26 <https://doi.org/10.1523/JNEUROSCI.6292-10.2011>, PMID: 21508221
- 27 Chambers CD, Garavan H, Bellgrove MA. Insights into the neural basis of response inhibition  
28 from cognitive and clinical neuroscience. *Neurosci Biobehav Rev.* 2009 May;33(5):631-46.  
29 doi: 10.1016/j.neubiorev.2008.08.016. Epub 2008 Sep 11. PMID: 18835296.
- 30 Chung JE, Magland JF, Barnett AH, Tolosa VM, Tooker AC, Lee KY, Shah KG, Felix SH, Frank  
31 LM, Greengard LF. A Fully Automated Approach to Spike Sorting. *Neuron.* 2017 Sep

- 1 13;95(6):1381-1394.e6. doi: 10.1016/j.neuron.2017.08.030. PMID: 28910621; PMCID:  
2 PMC5743236.
- 3 Churchland MM, Byron MY, Ryu SI, Santhanam G, Shenoy KV. Neural variability in premotor  
4 cortex provides a signature of motor preparation. *Journal of Neuroscience*. 2006 Apr  
5 5;26(14):3697-712.
- 6 Churchland MM, Yu BM, Cunningham JP, Sugrue LP, Cohen MR, Corrado GS, Newsome WT,  
7 Clark AM, Hosseini P, Scott BB, Bradley DC, Smith MA, Kohn A, Movshon JA, Armstrong  
8 KM, Moore T, Chang SW, Snyder LH, Lisberger SG, Priebe NJ, Finn IM, Ferster D, Ryu SI,  
9 Santhanam G, Sahani M, Shenoy KV. Stimulus onset quenches neural variability: a  
10 widespread cortical phenomenon. *Nat Neurosci*. 2010 Mar;13(3):369-78. doi:  
11 10.1038/nn.2501. Epub 2010 Feb 21. PMID: 20173745; PMCID: PMC2828350.
- 12 Claffey MP, Sheldon S, Stinear CM, Verbruggen F, Aron AR. Having a goal to stop action is  
13 associated with advance control of specific motor representations. *Neuropsychologia*. 2010  
14 Jan;48(2):541-8. doi: 10.1016/j.neuropsychologia.2009.10.015. Epub 2009 Oct 29. PMID:  
15 19879283; PMCID: PMC2813913.
- 16 Cohen MR, Maunsell JH. Attention improves performance primarily by reducing interneuronal  
17 correlations. *Nat Neurosci*. 2009 Dec;12(12):1594-600. doi: 10.1038/nn.2439. Epub 2009  
18 Nov 15. PMID: 19915566; PMCID: PMC2820564.
- 19 Delaville C, Navailles S, Benazzouz A. Effects of noradrenaline and serotonin depletions on the  
20 neuronal activity of globus pallidus and substantia nigra pars reticulata in experimental  
21 parkinsonism. *Neuroscience*. 2012 Jan 27;202:424-33.
- 22 Dorval AD, Russo GS, Hashimoto T, Xu W, Grill WM, Vitek JL. Deep brain stimulation reduces  
23 neuronal entropy in the MPTP-primate model of Parkinson's disease. *J Neurophysiol*. 2008  
24 Nov;100(5):2807-18. doi: 10.1152/jn.90763.2008. Epub 2008 Sep 10. PMID: 18784271;  
25 PMCID: PMC2585386.
- 26 Fan D, Rossi MA, Yin HH. Mechanisms of action selection and timing in substantia nigra  
27 neurons. *J Neurosci*. 2012 Apr 18;32(16):5534-48. doi: 10.1523/JNEUROSCI.5924-11.2012.  
28 PMID: 22514315; PMCID: PMC6703499.
- 29 Gu BM, Schmidt R, Berke JD. Globus pallidus dynamics reveal covert strategies for behavioral  
30 inhibition. *Elife*. 2020 Jun 10;9:e57215. doi: 10.7554/eLife.57215. PMID: 32519952; PMCID:  
31 PMC7314538.
- 32 Gulley JM, Kosobud AE, Rebec GV. Behavior-related modulation of substantia nigra pars  
33 reticulata neurons in rats performing a conditioned reinforcement task. *Neuroscience*.  
34 2002;111(2):337-49. doi: 10.1016/s0306-4522(02)00018-0. PMID: 11983319.

- 1 Hikosaka O, Wurtz RH. Visual and oculomotor functions of monkey substantia nigra pars  
2 reticulata. III. Memory-contingent visual and saccade responses. *Journal of*  
3 *Neurophysiology*. 1983a; 49:1268–1284.
- 4 Hikosaka O, Wurtz RH. Visual and oculomotor functions of monkey substantia nigra pars  
5 reticulata. IV. Relation of substantia nigra to superior colliculus. *J Neurophysiol*. 1983b  
6 May;49(5):1285-301. doi: 10.1152/jn.1983.49.5.1285. PMID: 6306173.
- 7 Jahanshahi M, Obeso I, Rothwell JC, Obeso JA. 2015. A fronto-striato-subthalamic-pallidal  
8 network for goal-directed and habitual inhibition. *Nature Reviews Neuroscience* 16:719–732.  
9 DOI: <https://doi.org/10.1038/nrn4038>, PMID: 26530468
- 10 Joshua M, Adler A, Rosin B, Vaadia E, Bergman H. Encoding of probabilistic rewarding and  
11 aversive events by pallidal and nigral neurons. *J Neurophysiol*. 2009 Feb;101(2):758-72.  
12 doi: 10.1152/jn.90764.2008. Epub 2008 Dec 3. PMID: 19052110.
- 13 Lauwereyns J, Watanabe K, Coe B, Hikosaka O. A neural correlate of response bias in monkey  
14 caudate nucleus. *Nature*. 2002 Jul;418(6896):413-7.
- 15 Legéndy CR, Salcman M. Bursts and recurrences of bursts in the spike trains of spontaneously  
16 active striate cortex neurons. *J Neurophysiol*. 1985 Apr;53(4):926-39. doi:  
17 10.1152/jn.1985.53.4.926. PMID: 3998798.
- 18 Leventhal DK, Gage GJ, Schmidt R, Pettibone JR, Case AC, Berke JD. Basal ganglia beta  
19 oscillations accompany cue utilization. *Neuron*. 2012 Feb 9;73(3):523-36. doi:  
20 10.1016/j.neuron.2011.11.032. PMID: 22325204; PMCID: PMC3463873.
- 21 Lintz MJ, Felsen G. Basal ganglia output reflects internally-specified movements. *Elife*. 2016 Jul  
22 5;5:e13833. doi: 10.7554/eLife.13833. PMID: 27377356; PMCID: PMC4970866.
- 23 Lobb C. Abnormal Bursting as a Pathophysiological Mechanism in Parkinson's Disease. *Basal*  
24 *Ganglia*. 2014 Apr 1;3(4):187-195. doi: 10.1016/j.baga.2013.11.002. PMID: 24729952;  
25 PMCID: PMC3979569.
- 26 Low KA, Miller J, Vierck E. Response slowing in Parkinson's disease: a psychophysiological  
27 analysis of premotor and motor processes. *Brain*. 2002 Sep;125(Pt 9):1980-94. doi:  
28 10.1093/brain/awf206. PMID: 12183344.
- 29 Mailly P, Charpier S, Menetrey A, Deniau JM. Three-dimensional organization of the recurrent  
30 axon collateral network of the substantia nigra pars reticulata neurons in the rat. *J Neurosci*.  
31 2003 Jun 15;23(12):5247-57. doi: 10.1523/JNEUROSCI.23-12-05247.2003. PMID:  
32 12832549; PMCID: PMC6741183.

- 1 Mallet N, Schmidt R, Leventhal D, Chen F, Amer N, Boraud T, Berke JD. 2016. Arkypallidal  
2 cells send a stop signal to striatum. *Neuron* 89:308–316. DOI:  
3 <https://doi.org/10.1016/j.neuron.2015.12.017>, PMID: 26777273
- 4 Mazzoni P, Hristova A, Krakauer JW. Why don't we move faster? Parkinson's disease,  
5 movement vigor, and implicit motivation. *J Neurosci*. 2007 Jul 4;27(27):7105-16. doi:  
6 10.1523/JNEUROSCI.0264-07.2007. PMID: 17611263; PMCID: PMC6794577.
- 7 Meyer HC, Bucci DJ. Neural and behavioral mechanisms of proactive and reactive inhibition.  
8 *Learn Mem*. 2016 Sep 15;23(10):504-14. doi: 10.1101/lm.040501.115. PMID: 27634142;  
9 PMCID: PMC5026209.
- 10 Paxinos CW. 2006. *The Rat Brain in Stereotaxic Coordinates*. Academic Press. DOI:  
11 <https://doi.org/10.1046/j.1469-7580.1997.191203153.x>
- 12 Phillips RS, Rosner I, Gittis AH, Rubin JE. The effects of chloride dynamics on substantia nigra  
13 pars reticulata responses to pallidal and striatal inputs. *Elife*. 2020 Sep 7;9:e55592.
- 14 Pouget P, Logan GD, Palmeri TJ, Boucher L, Paré M, Schall JD. Neural basis of adaptive  
15 response time adjustment during saccade countermanding. *J Neurosci*. 2011 Aug  
16 31;31(35):12604-12. doi: 10.1523/JNEUROSCI.1868-11.2011. PMID: 21880921; PMCID:  
17 PMC3173043.
- 18 Rubin JE, McIntyre CC, Turner RS, Wichmann T. Basal ganglia activity patterns in parkinsonism  
19 and computational modeling of their downstream effects. *Eur J Neurosci*. 2012  
20 Jul;36(2):2213-28. doi: 10.1111/j.1460-9568.2012.08108.x. PMID: 22805066; PMCID:  
21 PMC3400124.
- 22 Sato M, Hikosaka O. Role of primate substantia nigra pars reticulata in reward-oriented  
23 saccadic eye movement. *J Neurosci*. 2002 Mar 15;22(6):2363-73. doi:  
24 10.1523/JNEUROSCI.22-06-02363.2002. PMID: 11896175; PMCID: PMC6758246.
- 25 Schmidt R, Leventhal DK, Mallet N, Chen F, Berke JD. 2013. Canceling actions involves a race  
26 between basal ganglia pathways. *Nature Neuroscience* 16:1118–1124. DOI:  
27 <https://doi.org/10.1038/nn.3456>, PMID: 23852117
- 28 Schmidt R, Berke JD. 2017. A Pause-then-Cancel model of stopping: evidence from basal  
29 ganglia neurophysiology. *Philosophical Transactions of the Royal Society B: Biological*  
30 *Sciences* 372:20160202. DOI: <https://doi.org/10.1098/rstb.2016.0202>
- 31 Sharott A, Gulberti A, Zittel S, Tudor Jones AA, Fickel U, Münchau A, Köppen JA, Gerloff C,  
32 Westphal M, Buhmann C, Hamel W, Engel AK, Moll CK. Activity parameters of subthalamic  
33 nucleus neurons selectively predict motor symptom severity in Parkinson's disease. *J*



- 1 Neurosci. 2014 Apr 30;34(18):6273-85. doi: 10.1523/JNEUROSCI.1803-13.2014. PMID:  
2 24790198; PMCID: PMC4004813.
- 3 Simmons DV, Higgs MH, Lebbly S, Wilson CJ. Indirect pathway control of firing rate and pattern  
4 in the substantia nigra pars reticulata. *Journal of Neurophysiology*. 2020 Feb 1;123(2):800-  
5 14.
- 6 Tai CH. Subthalamic burst firing: A pathophysiological target in Parkinson's disease. *Neurosci*  
7 *Biobehav Rev*. 2022 Jan;132:410-419. doi: 10.1016/j.neubiorev.2021.11.044. Epub 2021  
8 Nov 29. PMID: 34856222.
- 9 Wager TD, Sylvester CY, Lacey SC, Nee DE, Franklin M, Jonides J. Common and unique  
10 components of response inhibition revealed by fMRI. *Neuroimage*. 2005 Aug 15;27(2):323-  
11 40. doi: 10.1016/j.neuroimage.2005.01.054. PMID: 16019232.
- 12 Waschke L, Kloosterman NA, Obleser J, Garrett DD. Behavior needs neural variability. *Neuron*.  
13 2021 Mar 3;109(5):751-66.
- 14 Willard AM, Isett BR, Whalen TC, Mastro KJ, Ki CS, Mao X, Gittis AH. State transitions in the  
15 substantia nigra reticulata predict the onset of motor deficits in models of progressive  
16 dopamine depletion in mice. *Elife*. 2019 Mar 6;8:e42746. doi: 10.7554/eLife.42746. PMID:  
17 30839276; PMCID: PMC6402832.
- 18 Wiltschko AB, Gage GJ, Berke JD. Wavelet filtering before spike detection preserves waveform  
19 shape and enhances single-unit discrimination. *J Neurosci Methods*. 2008 Aug  
20 15;173(1):34-40. doi: 10.1016/j.jneumeth.2008.05.016. Epub 2008 May 28. PMID:  
21 18597853; PMCID: PMC2602872.
- 22 Yasuda M, Hikosaka O. To wait or not to wait—separate mechanisms in the oculomotor circuit  
23 of basal ganglia. *Frontiers in Neuroanatomy*. 2017 Apr 11;11:35.
- 24 Zhou FM, Lee CR. Intrinsic and integrative properties of substantia nigra pars reticulata  
25 neurons. *Neuroscience*. 2011 Dec 15;198:69-94. doi: 10.1016/j.neuroscience.2011.07.061.  
26 Epub 2011 Aug 2. PMID: 21839148; PMCID: PMC3221915.

27

## 28 **Supplemental information**

29 **Supplementary Figure 1.** (A) Brain slice examples of using CD11 antibody or Cresyl violet to  
30 mark electrode tip after making lesion. (B) Estimated locations of recorded cells, within coronal  
31 atlas sections (Paxinos & Watson 2006).

32

1 **Supplementary Figure 2.** Ipsi>Contra type cells are further divided into increase (A) and  
2 decrease (B) type cells. Both group of cells show significantly increase firing rates before *Go!*  
3 cues. Same formats as in the figure 2.  
4  
5 **Supplementary Figure 3.** (A) PCA was performed using 500 ms epoch around Center Out for  
6 contra and ipsi movements (averaged, normalized firing rates were concatenated). (B) Variance  
7 explained by each of the first 10 PCs. (C) The first 10 principal components. (D) Population  
8 dynamics of different trial outcomes (200ms around *Go!* cue) show different neural trajectory  
9 patterns. Permutation test shows positioning differences at *Go!* cue compared to correct contra  
10 go trials. The trials with wrong choice are biased toward ipsi action initiation at the time of *Go!*  
11 cue. Formats of permutation histograms are same as in figure 3.  
12  
13 **Supplementary Figure 4.** (A) Sessions with high CV (averaged across units) shows longer  
14 reaction times (mean reaction times of all trials). Each data point shows the value of each  
15 session. (B) Sessions with bigger increase of CV during proactive inhibition shows bigger  
16 proactive inhibition effects. (C) Sessions with proactive inhibition effect show bigger CV  
17 compared to the sessions without proactive inhibition effect in individual rats (one-tailed  
18 Wilcoxon signed rank test,  $p < 0.05$ ).  
19  
20 **Supplementary Figure 5.** Both Contra>Ipsi and Ipsi>Contra type of cells show increased CV  
21 and burst ratios with selective proactive inhibition, however only Contra>Ipsi cells shows a  
22 statistically significant effect (Wilcoxon signed rank test). Same format as in the figure 4D.  
23  
24 **Supplementary Figure 6.** Individual rat data shows firing rates (during 200ms before *Go!* cue)  
25 and CV (3s before *Go!* cue) differences between two conditions. \* $p < 0.05$  without correction,

- 1 \*\* $p < 0.05$  with Bonferroni correction (Wilcoxon signed rank tests in each subject). Error bar
- 2 indicate  $\pm$ S.E.M.
- 3

## Figure 1

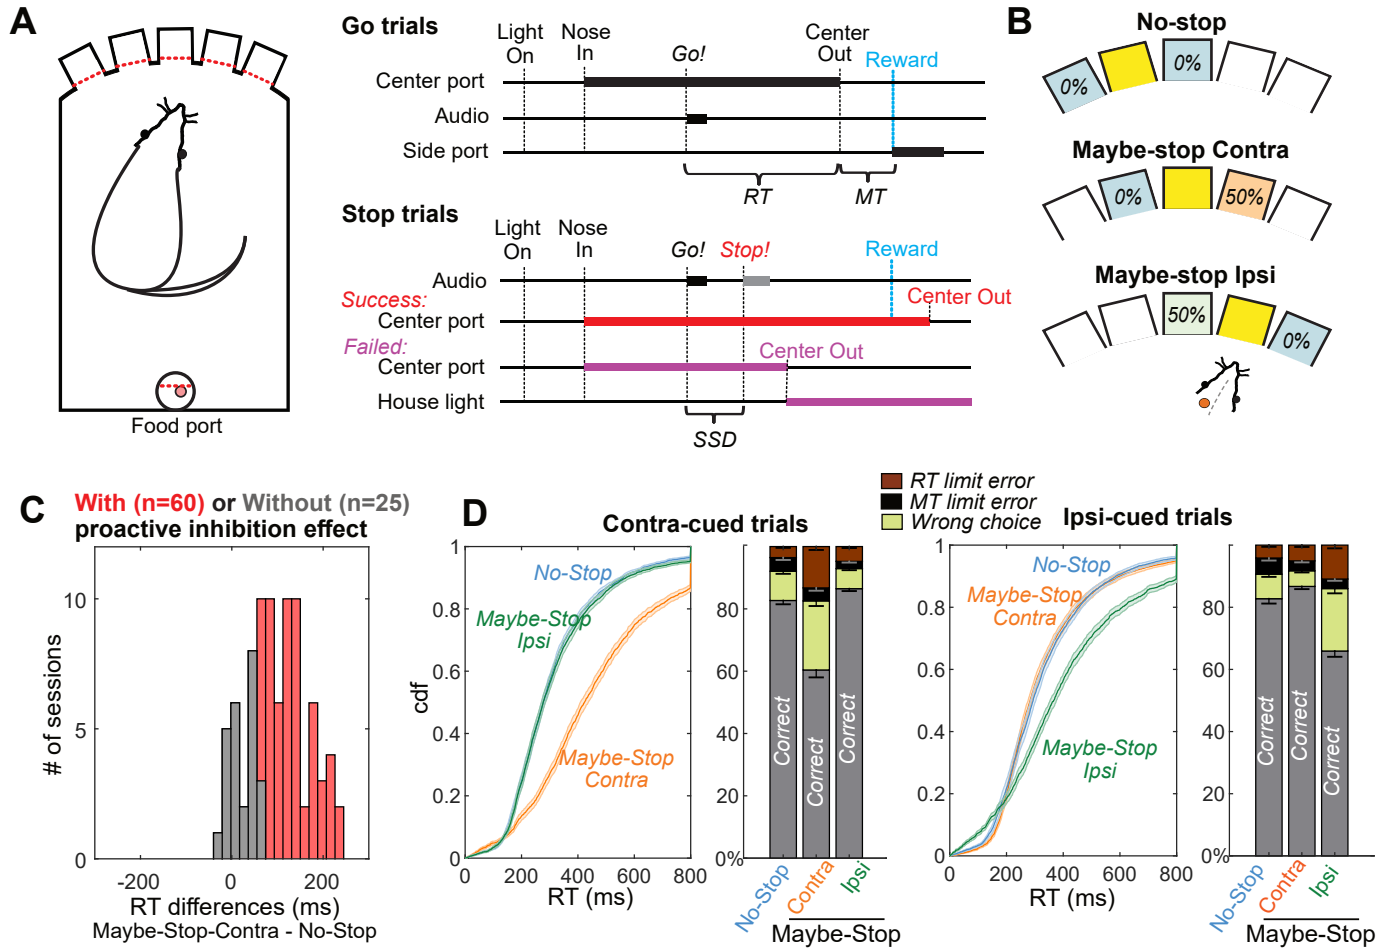

## Figure 2

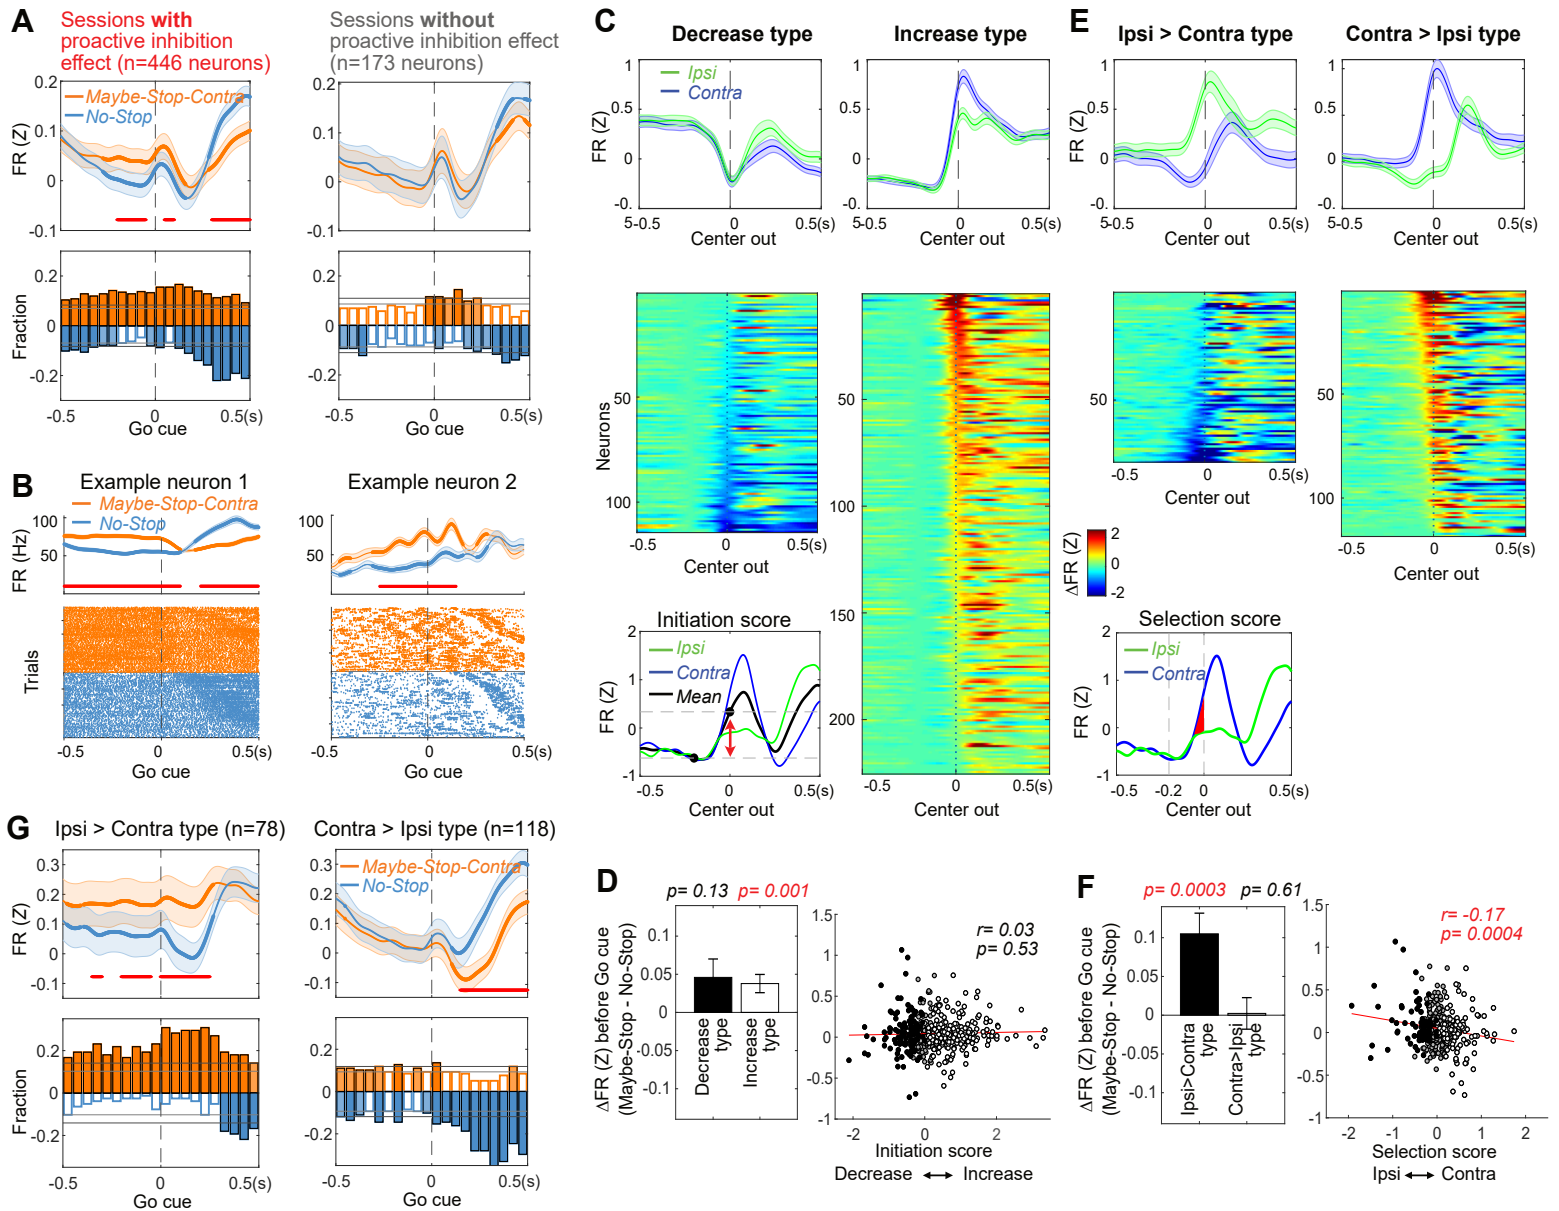



## Figure 3

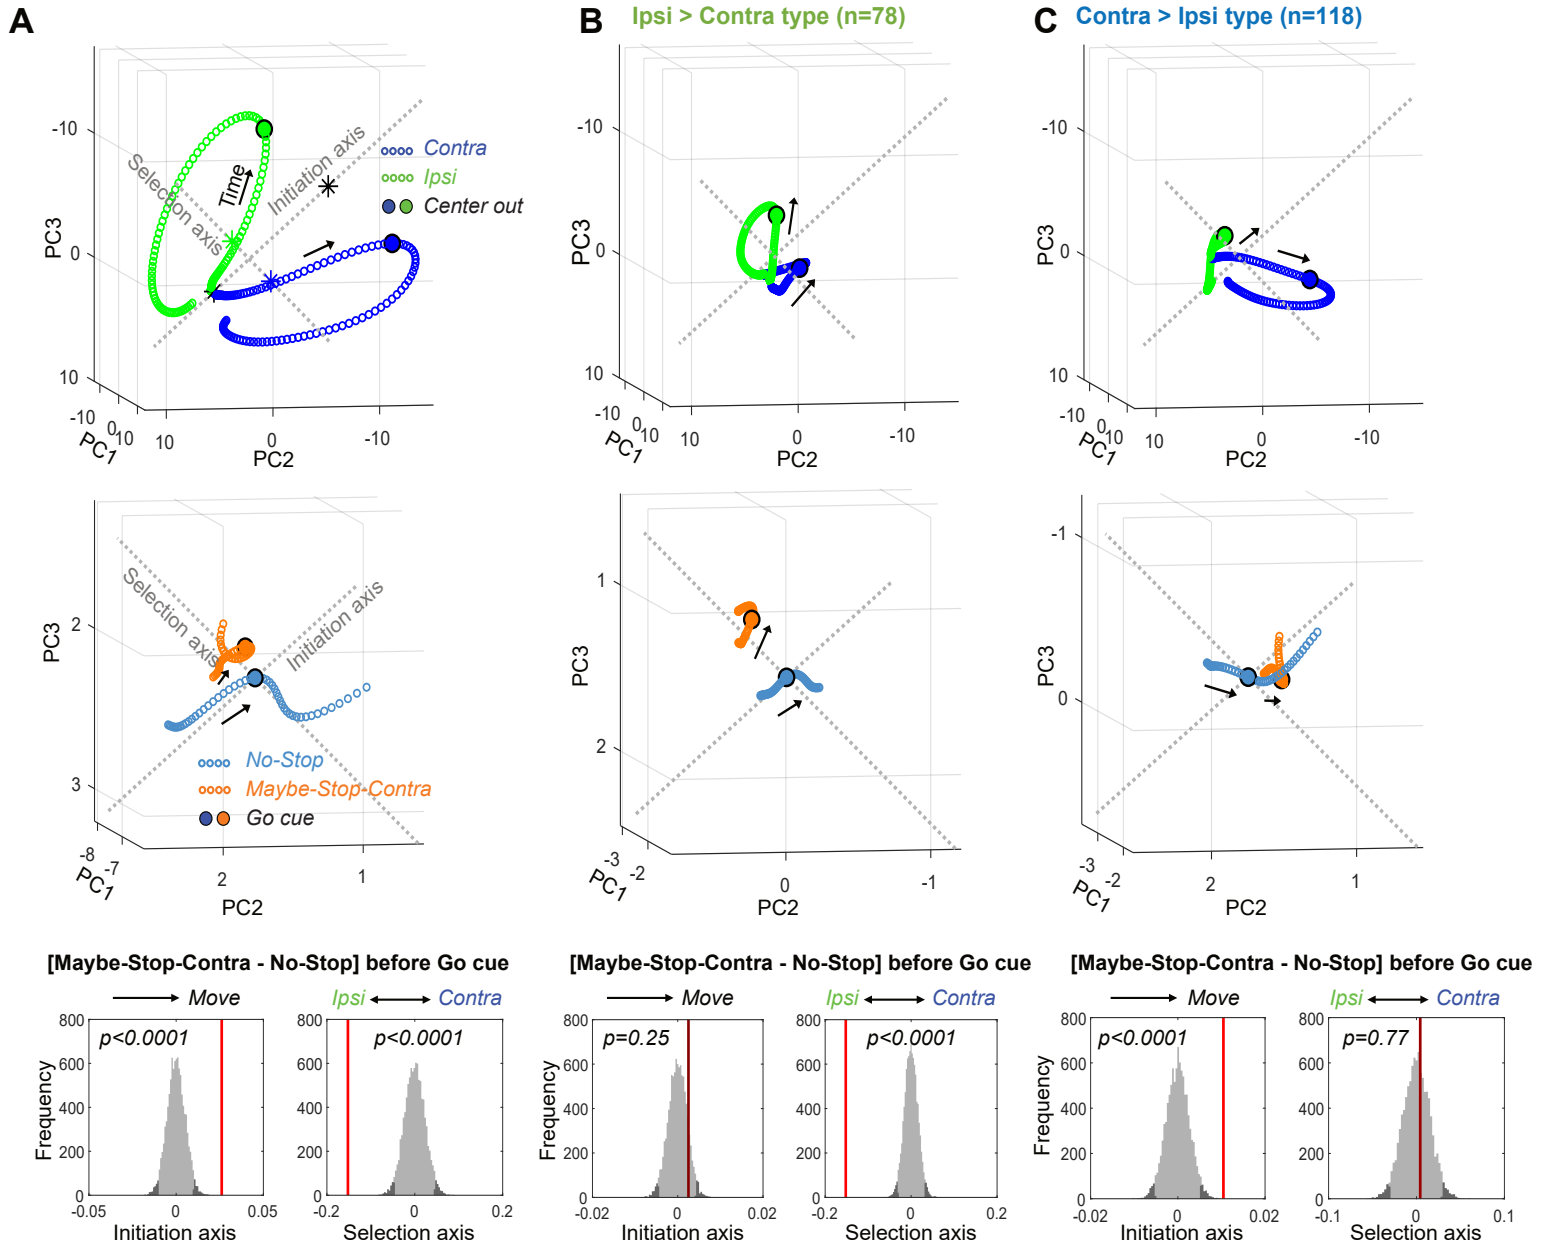

## Figure 4

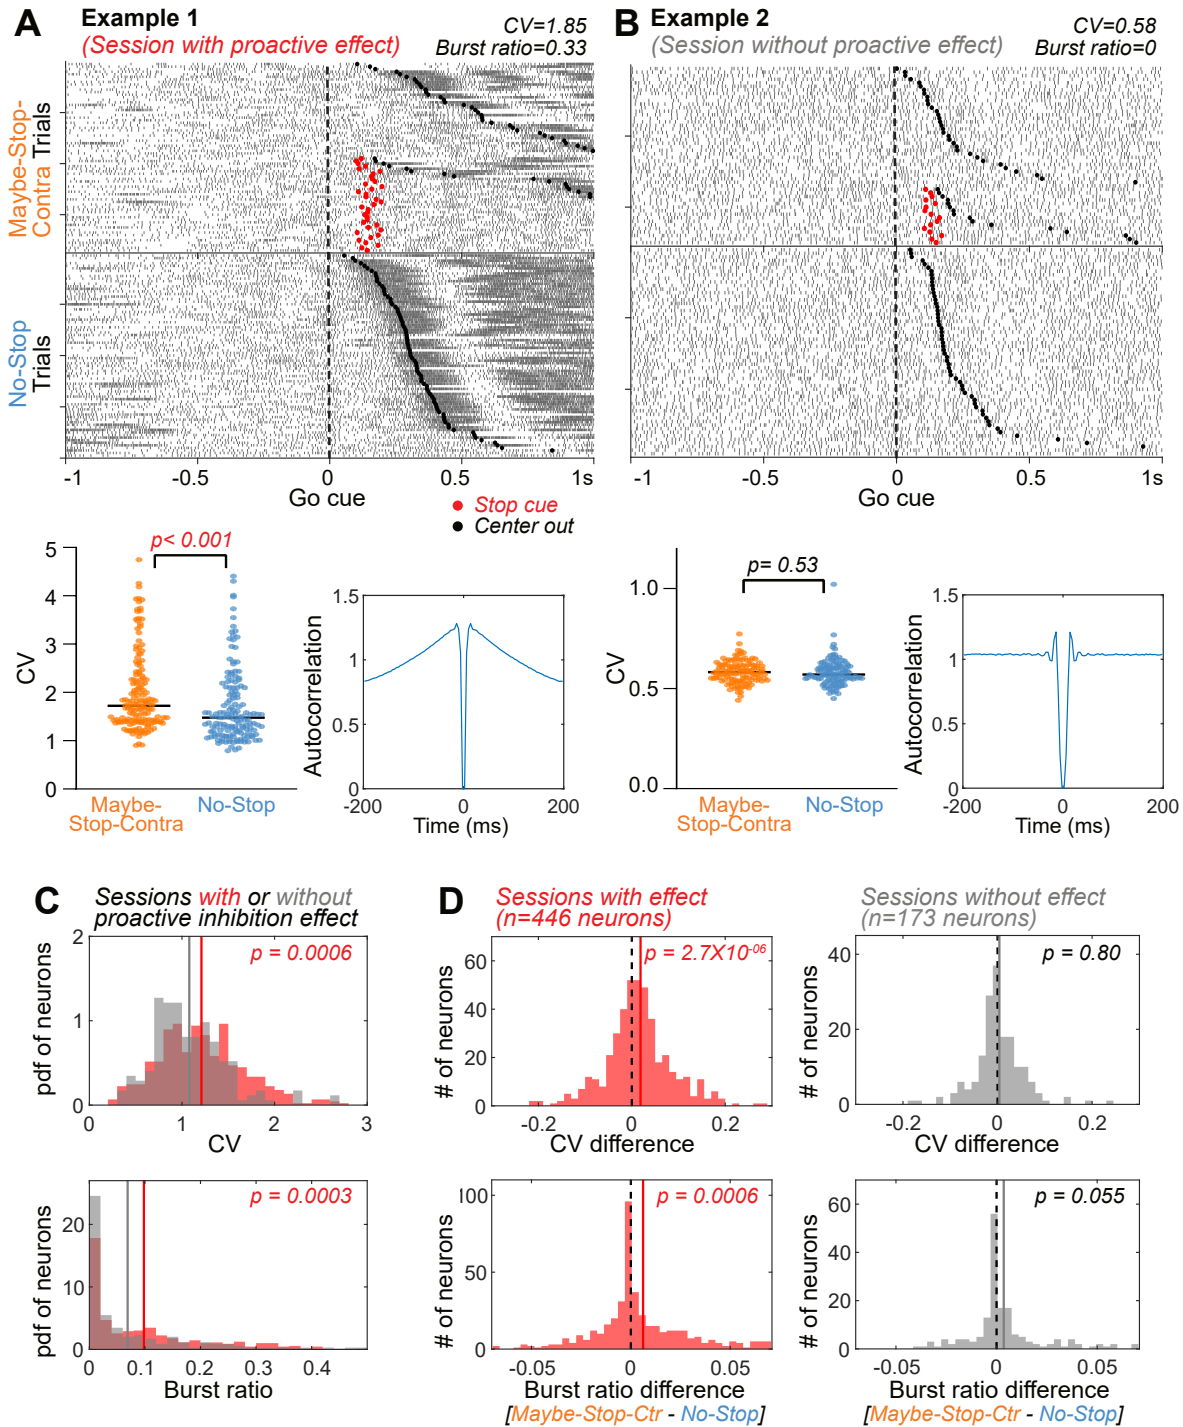

## Figure 5

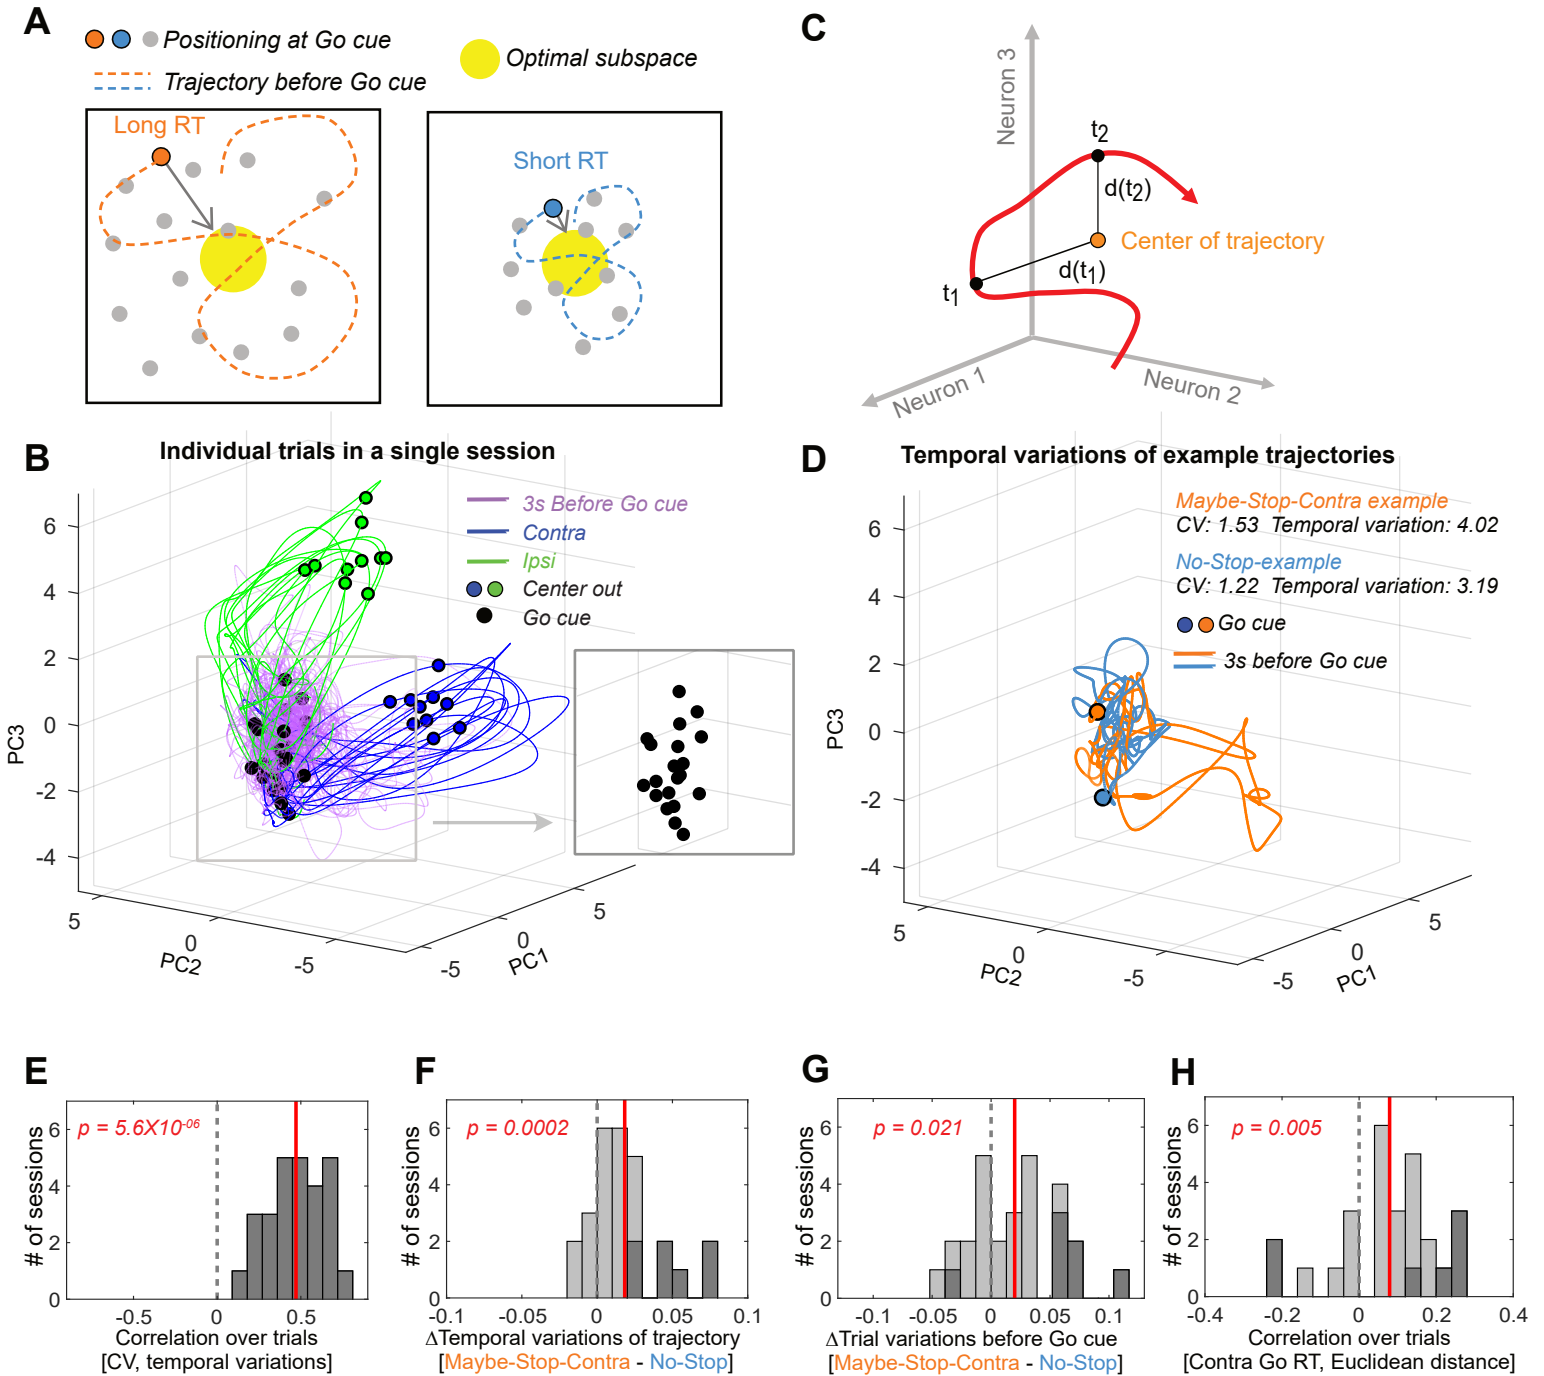

**Figure 6**

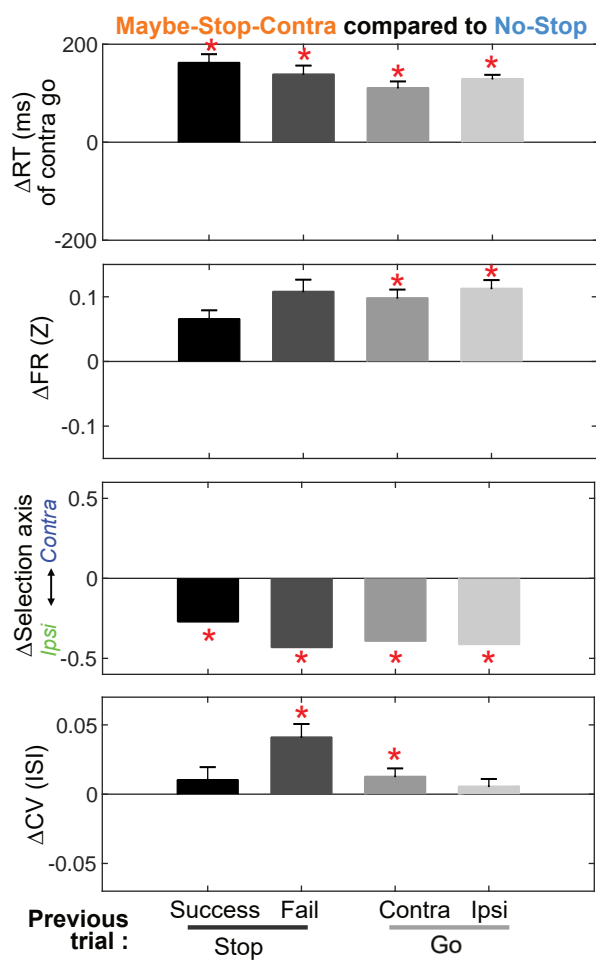

Source: https://www.biorxiv.org/content/10.1101/2022.04.23.489276v2.full.pdf
